# Supplementary material for: Comparative genomics reveals the diversification of triterpenoid biosynthesis and origin of ocotillol-type triterpenes in Panax
Source: PubMed Central journal article supplement — Plant Commun. 2023 Mar 16;4(4):100591. doi: 10.1016/j.xplc.2023.100591 (PMC10363511; doi:10.1016/j.xplc.2023.100591), 2023-03-16
Supplement: mmc1.pdf [file mmc1.pdf]

**Plant Communications, Volume 4**

**Supplemental information**

**Comparative genomics reveals the diversification of triterpenoid biosynthesis and origin of ocotillol-type triterpenes in *Panax***

**Zijiang Yang, Xiaobo Li, Ling Yang, Sufang Peng, Wanling Song, Yuan Lin, Guisheng Xiang, Ying Li, Shuang Ye, Chunhua Ma, Jianhua Miao, Guanghui Zhang, Wei Chen, Shengchao Yang, and Yang Dong**

1 **Zijiang Yang, Xiaobo Li, Ling Yang, Wanling Song, Yuan Lin, Guisheng Xiang, Ying Li,**  
2 **Shuang Ye, Chunhua Ma, Jianhua Miao, Guanghui Zhang, Wei Chen, Shengchao Yang,**  
3 **Yang Dong.**

4 **National & Local Joint Engineering Research Center on Germplasm Innovation &**  
5 **Utilization of Chinese Medicinal Materials in Southwest China, Yunnan Agricultural**  
6 **University, Kunming, China**

7 **The Key Laboratory of Medicinal Plant Biology of Yunnan Province, Yunnan Agricultural**  
8 **University, Kunming, China**

9 **College of Food Science and Technology, Yunnan Agricultural University, Kunming, China**

10 **Guangxi Key Laboratory of Medicinal Resources Protection and Genetic Improvement,**  
11 **Guangxi Botanical Garden of Medicinal Plants, Nanning, China**

12 **Yunnan Plateau Characteristic Agriculture Industry Research Institute, Kunming, China**

13

14 **Comparative genomics reveals the diversification of triterpenoid biosynthesis and origin of**  
15 **ocotillol-type triterpenes in *Panax***

16 **Supporting Information Methods S1. Characterization of compounds produced from**  
17 **enzymatic reactions**

18 **Gas chromatography-mass spectrometry (GC-MS) analysis**

19 The purified yeast extract was derivatized by resuspending in 100  $\mu\text{l}$  of trimethylsilyl cyanide  
20 (TMSCN) with a 1:1 ratio followed by incubation of 30 min at 65  $^{\circ}\text{C}$ . GC analysis was performed  
21 by Agilent 7890A with a HP-5MS quartz capillary column (30 m $\times$ 0.25 mm i.d., 0.25  $\mu\text{m}$  film  
22 thickness). The temperature was set as 250  $^{\circ}\text{C}$  for injector port, source, and transfer line. The  
23 column temperature was programmed as follows: 80  $^{\circ}\text{C}$  for 2 min; increase to 290  $^{\circ}\text{C}$  at a rate of  
24 20  $^{\circ}\text{C min}^{-1}$ ; hold at 290  $^{\circ}\text{C}$  for 30 min. The flow rate of carrier gas helium was 1.2 ml  $\text{min}^{-1}$ .  
25 Samples were injected in splitless mode with either a 1- $\mu\text{l}$  or a 3- $\mu\text{l}$  volume. MS analysis was  
26 performed using Agilent 6540 Accurate-Mass Q-TOF system.

27 **Triterpenoid standards preparation**

28  $\delta$ -amyrin,  $\beta$ -amyrin,  $\alpha$ -amyrin, cycloartenol,  $\psi$ -taraxasterol, taraxasterol, and dammarendiol-II  
29 were purchased from Chengdu DeSiTe Biological Technology Co. Ltd, China; 3-epicabraleadiol  
30 was purchased from BioBioPha Co. Ltd, China. Standards were first dissolved in hexane,  
31 followed by derivatization using TMSCN.

### 32 **Nuclear Magnetic Resonance (NMR) analysis**

33 The purified yeast extract was subjected to column chromatography (CC) on silica gel (200-300  
34 mesh, Qingdao Marine Chemical Factory, China) eluting with petroleum ether and then with  
35 petroleum ether/ethyl acetate stepwise-gradient system (from 13:1 to 5:1, v/v) to obtain four  
36 fractions (denoted as Fr.1–Fr.4). Fr.4 was purified by semi-preparative high-performance liquid  
37 chromatography (HPLC) on Agilent 1290 Infinity II system with off-line monitoring by thin-layer  
38 chromatography (TLC). The column used for HPLC was a reversed-phase column (Agilent  
39 ZORBAX StableBond SB-C18, 9.4  $\times$  250 mm, 5  $\mu$ m). The setting for mobile phase was 100%  
40 acetonitrile at a flow rate of 3 ml min<sup>-1</sup>. TLC analysis was carried out on silica gel plates (GF254F,  
41 10 - 40  $\mu$ m, Qingdao Marine Chemical Factory) by spraying with 5% H<sub>2</sub>SO<sub>4</sub> in EtOH (v/v)  
42 followed by heating to 120 °C for 5 min. The above process yielded compound **8** (3 mg,  
43 containing trace amount of compound **9**) and compound **9** (12 mg). The purified compound **8** and  
44 **9** was analyzed by <sup>1</sup>H-NMR and <sup>13</sup>C-NMR spectroscopy at 600 and 150 MHz in CDCl<sub>3</sub> solution  
45 using Bruker AV-600 MHz spectrometer.

### 46 **Identification of compounds**

47 Through GC analysis, the product profile for nine OSCs were identified (Table S24). The naming  
48 of compounds was in consistent with Figure 4C. Based on the GC retention times and mass  
49 spectral fragmentation patterns from existing literatures (Shan *et al.*, 2005; Salmon *et al.*, 2016;  
50 Kim *et al.*, 2018), the compounds were identified as follows: compound **1**:  $\delta$ -amyrin; compound **2**:  
51  $\beta$ -amyrin; compound **3**:  $\alpha$ -amyrin; compound **5**:  $\psi$ -taraxasterol, compound **6**: taraxasterol;  
52 compound **7**: dammarendiol-II; compound **8**: 3-epicabraleadiol; compound **9**: ocotillol (Figures  
53 S19-S22).

54 Since authentic standard for ocotillol is not available. The NMR analysis was further performed to  
55 characterize the compound **8** and compound **9**. By comparison of NMR and mass spectroscopic  
56 data with previous study (Shan *et al.*, 2005), C-24S or C-24R epimers of the epoxydammaranes

57 can be distinguished by the <sup>1</sup>H-NMR chemical shifts of H-24 and <sup>13</sup>C-NMR chemical shifts of C-  
58 24, C-25, C-21, C-23 and C-22 positions. Chemical shifts and coupling constants at H-24 vary  
59 remarkably for molecules with locally diastereomeric configurations at C-20 and C-24 (Figures  
60 S24-S26, Table S23).

## 61 **References for Methods S1**

62 **Shan, H., Segura, M.J., Wilson, W.K., Lodeiro, S., Matsuda, S.P.** (2005). Enzymatic  
63 cyclization of dioxidosqualene to heterocyclic triterpenes. *J. Am. Chem. Soc.* **127**: 18008–18009.  
64 **Salmon, M., Thimmappa, R.B., Minto, R.E., Melton, R.E., Hughes, R.K., O'Maille, P.E.,**  
65 **Hemmings, A.M., Osbourn, A.** (2016). A conserved amino acid residue critical for product and  
66 substrate specificity in plant triterpene synthases. *Proc. Natl. Acad. Sci. U.S.A.* **113**: E4407–  
67 E4414.  
68 **Kim, O.T., Um, Y., Jin, M.L., Kim, J.U., Hegebarth, D., Busta, L., Racovita, R.C., Jetter, R.**  
69 (2018). A Novel Multifunctional C-23 Oxidase, CYP714E19, is Involved in Asiaticoside  
70 Biosynthesis. *Plant Cell Physiol.* **59**: 1200–1213.

**A**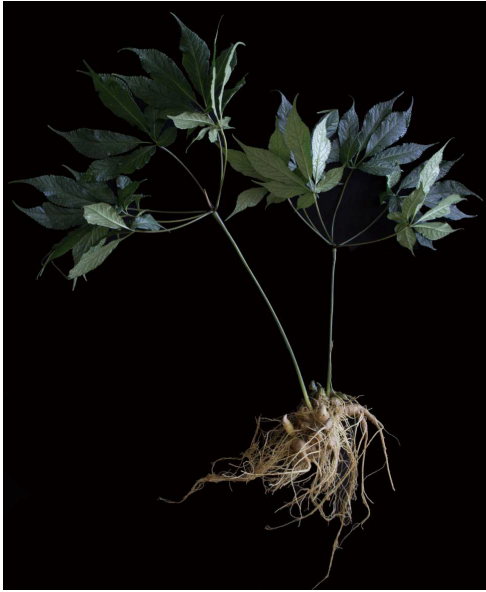**B**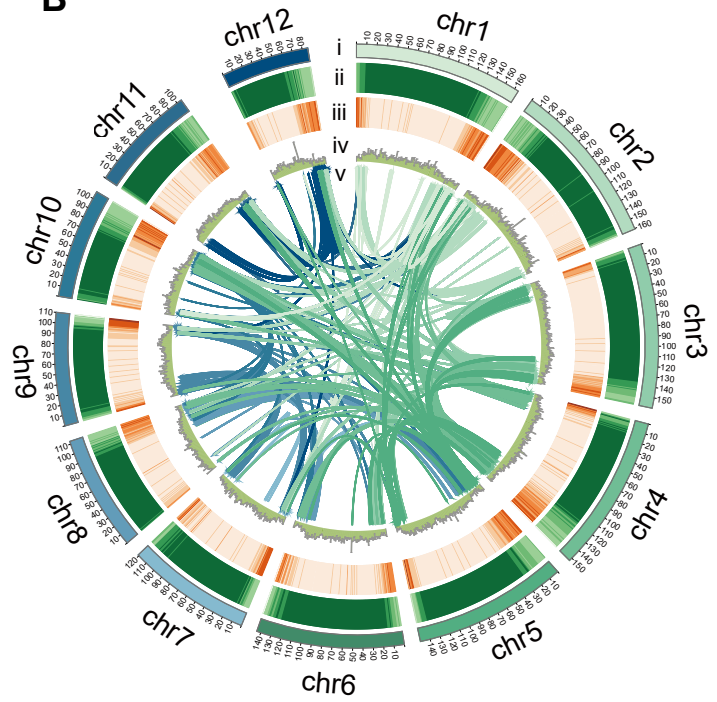

**Figure S1** Morphology and genome of *P. vietnamensis* var. *fuscidiscus*. (A) Morphology of *P. vietnamensis* var. *fuscidiscus*. (B) Overview of *P. vietnamensis* var. *fuscidiscus* assembly. (I) chromosomes; (II) transposable elements density heatmap (1 Mb sliding window); (III) gene density heatmap (1 Mb sliding window); (IV) GC content (1 Mb sliding window); (V) collinear regions within *P. vietnamensis* var. *fuscidiscus* genome.

**A**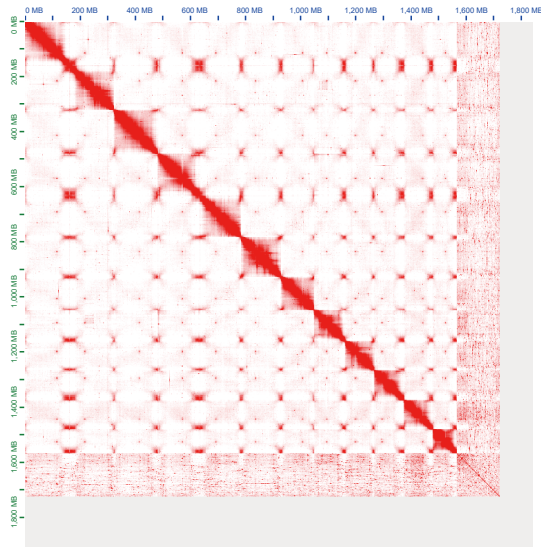

*Panax vietnamensis* var. *fuscidiscus*

**B**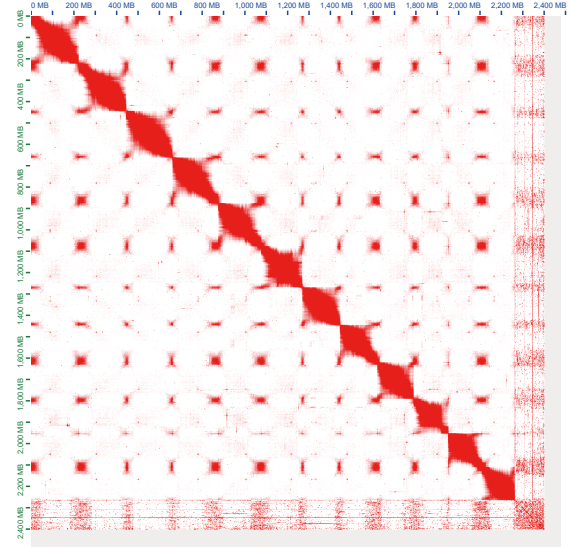

*Panax notoginseng*

**Figure S2** Hi-C contact heatmaps. (A) *P. vietnamensis* var. *fuscidiscus* assembly. (B) Updated *P. notoginseng* assembly.

**A**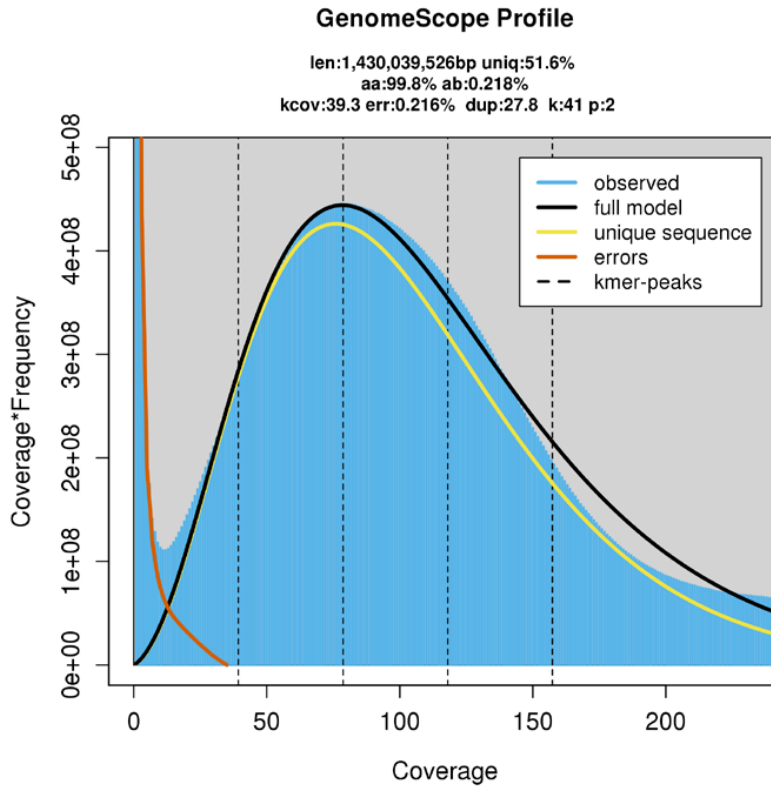**B****BUSCO Assessment Results**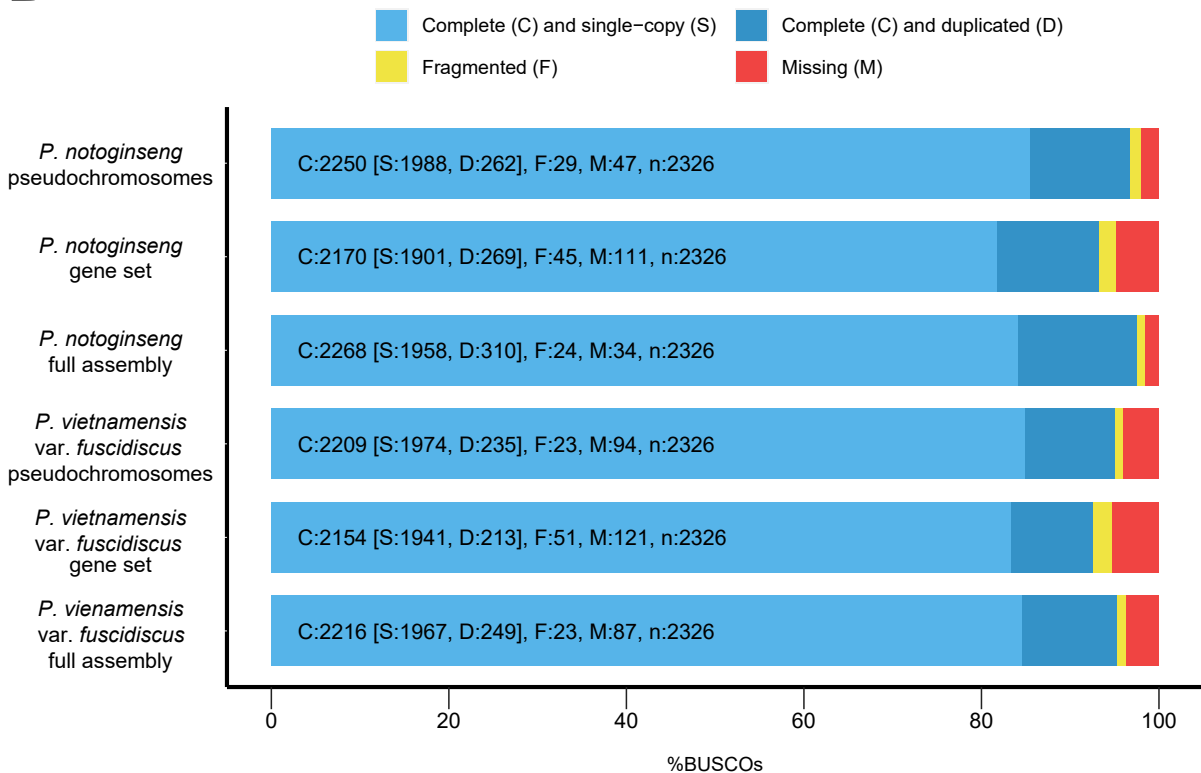

**Figure S3** Genome survey and evaluation. (A) Survey of *P. vietnamensis* var. *fuscidiscus* genome by Genomescope. Ploidy and kmer length were set as 2 and 41, respectively. (B) BUSCO analysis of *P. vietnamensis* var. *fuscidiscus* and *P. notoginseng* assemblies and gene sets using the lineage dataset eudicots\_odb10 (2,326 BUSCOs).

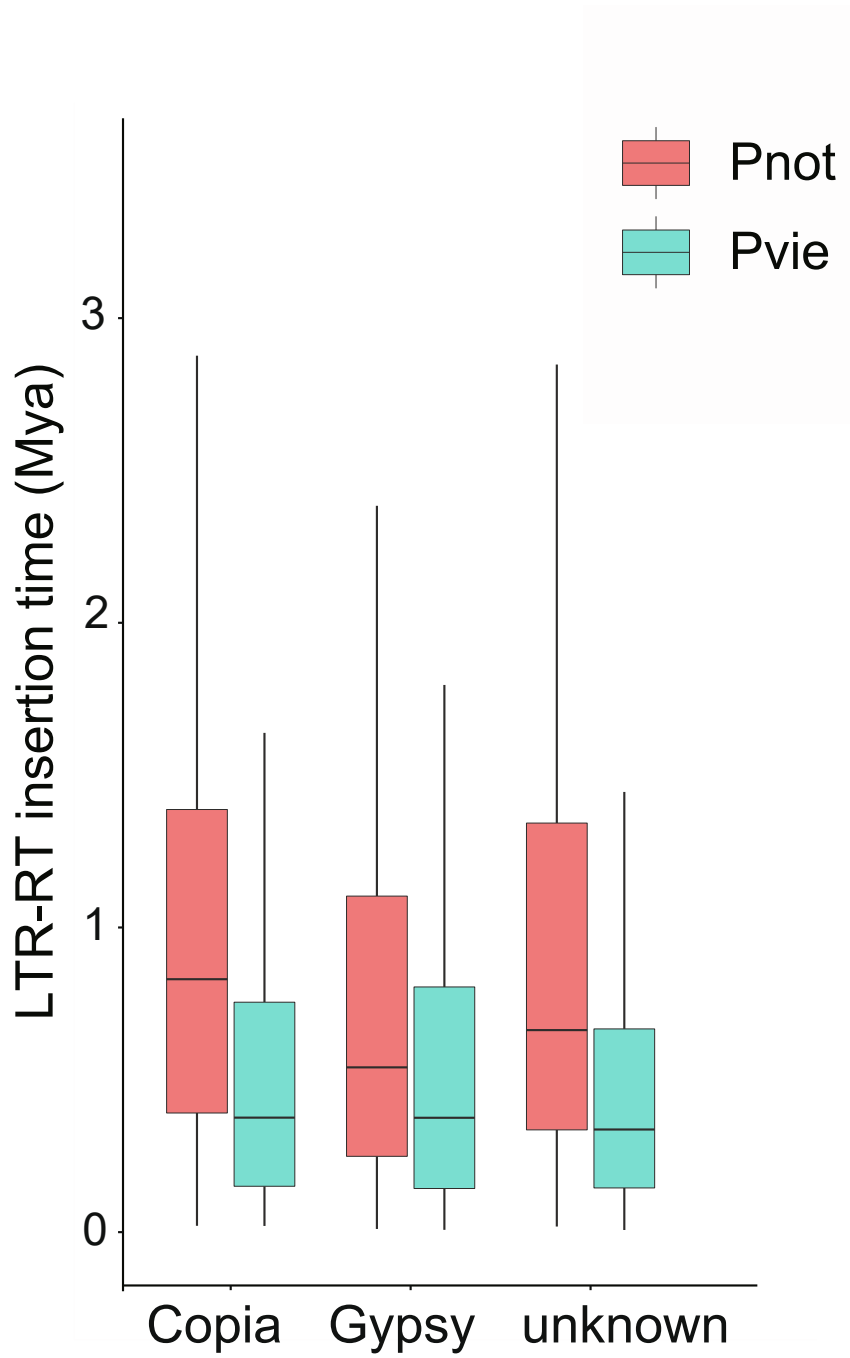

**Figure S4** Estimated insertion time for Copia, Gypsy, and unknown type of LTRs in *P. vietnamensis* var. *fuscidiscus* and *P. notoginseng* genomes. Pvie: *P. vietnamensis* var. *fuscidiscus*, Pnot: *P. notoginseng*.



**A**

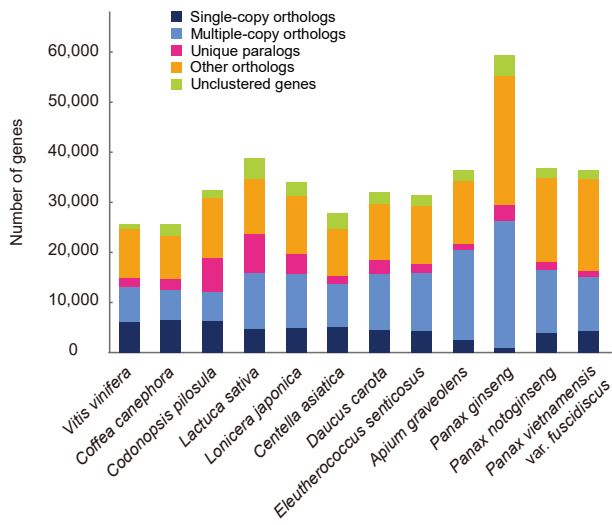

**B**

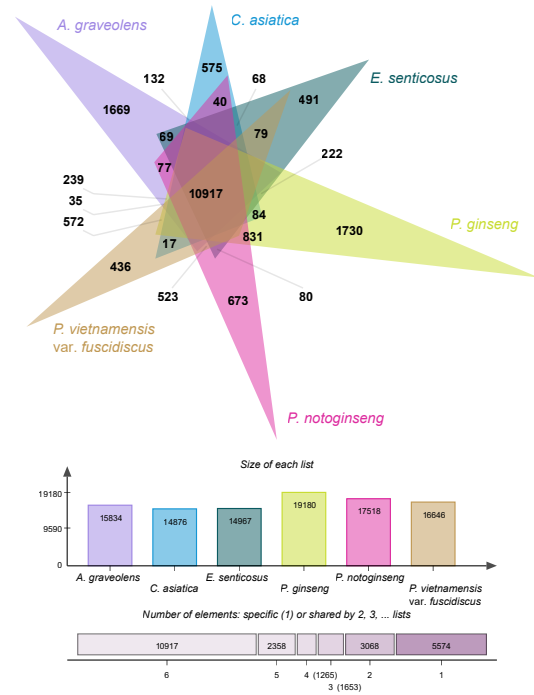

**Figure S5** Orthology analyses. (A) Gene family analysis result for 12 eudicots. (B) Comparison of orthogroups from six Apiales species. Numbers in the upper venn diagram indicate the number of orthogroups. Numbers in the middle bar plot indicate the genes in the orthogroups for six species. Numbers in the bottom chart indicate number of shared or species-specific orthogroups.

**A**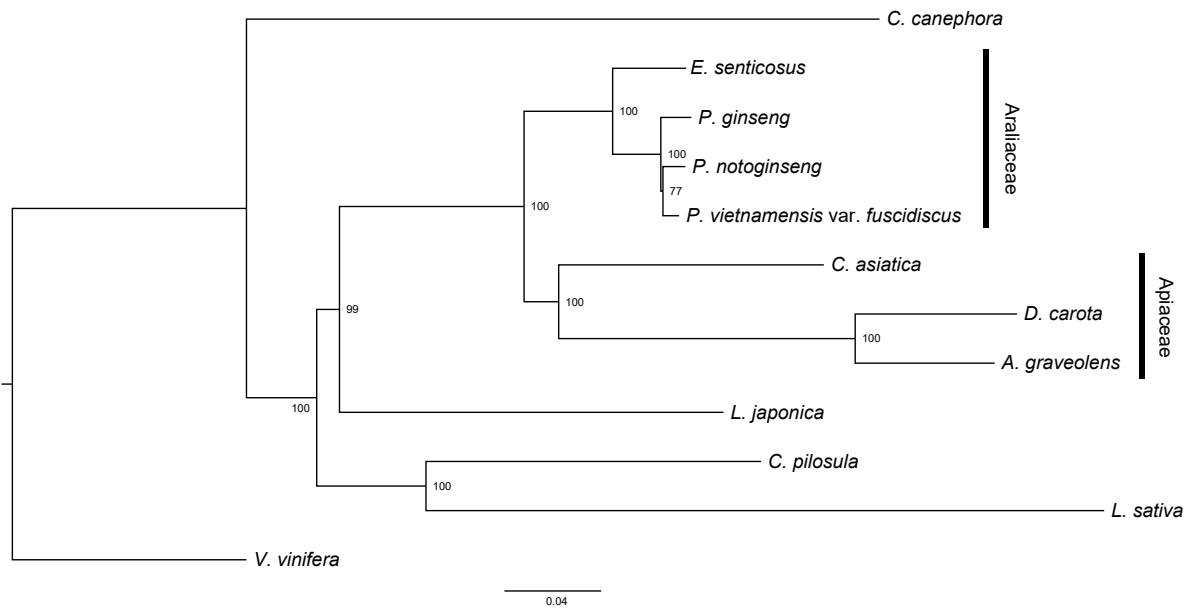**B**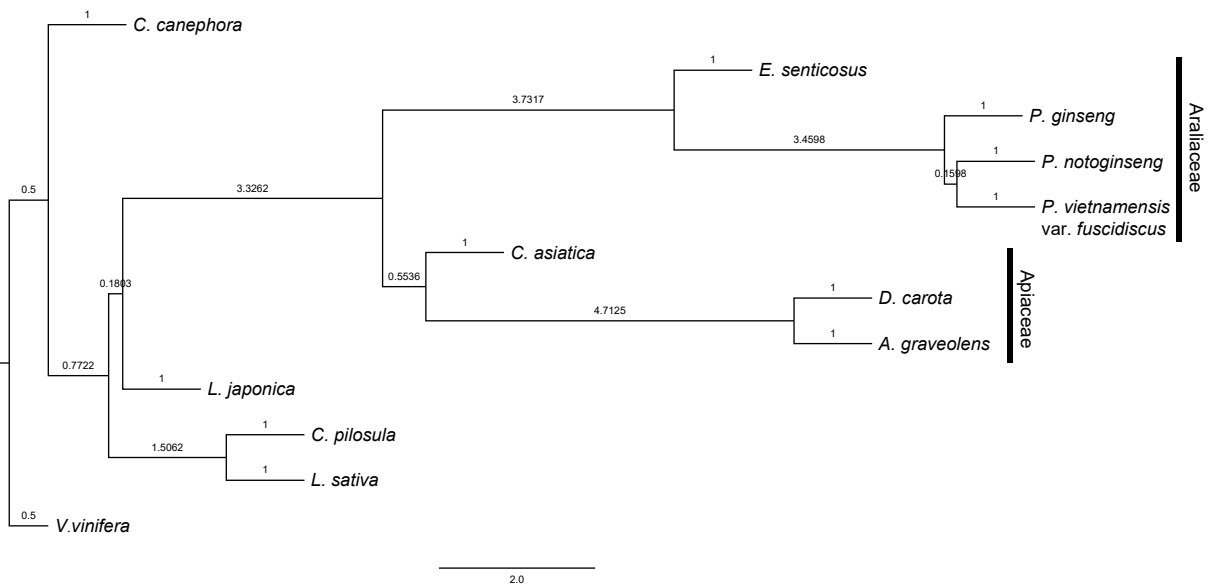

**Figure S6** Phylogenetic analyses. (A) Species tree for 12 species inferred by concatenation-based method. Numbers indicate bootstrap values with 1,000 replicates. (B) Species tree for 12 species inferred by coalescence-based method. Branch lengths are shown in coalescent units. The numbers of each node represents the local posterior probabilities. Since the ASTRAL tree leaves the branch length of terminal branches empty, the length of terminal branches were all set as one.

A

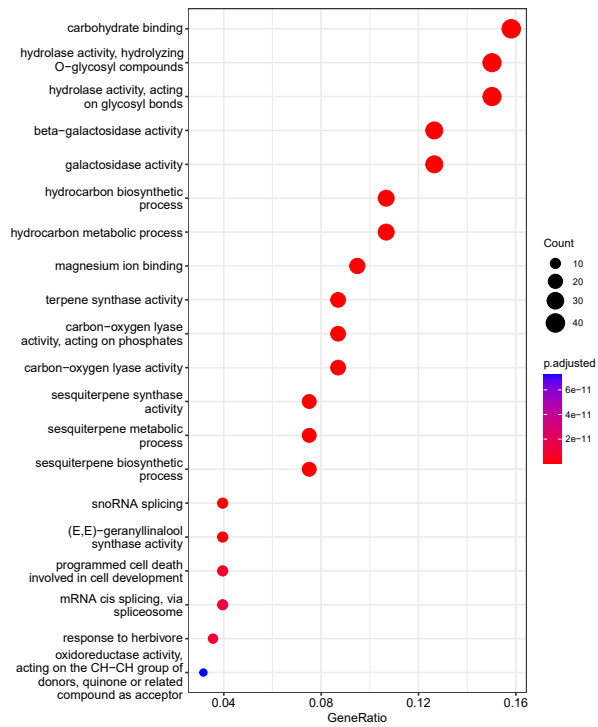

B

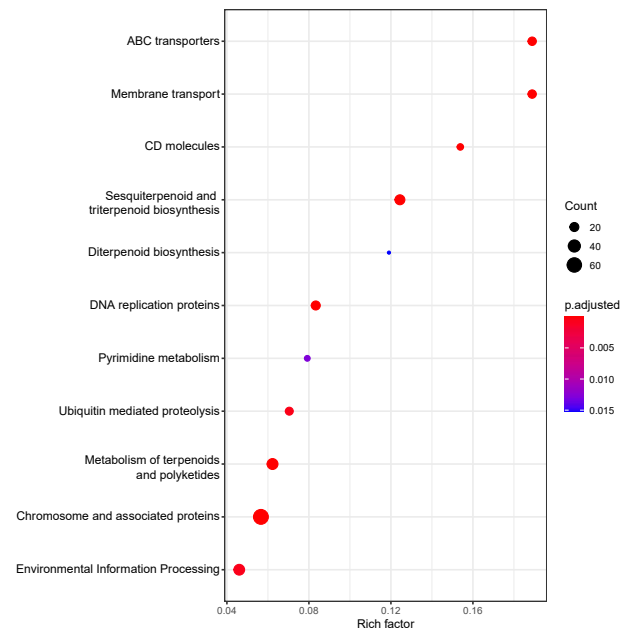

**Figure S7** Functional enrichment analyses. (A) GO enrichment analysis of expanded gene families in *P. vietnamensis* var. *fuscidiscus*. (B) KEGG enrichment analysis of expanded gene families in *P. vietnamensis* var. *fuscidiscus*.

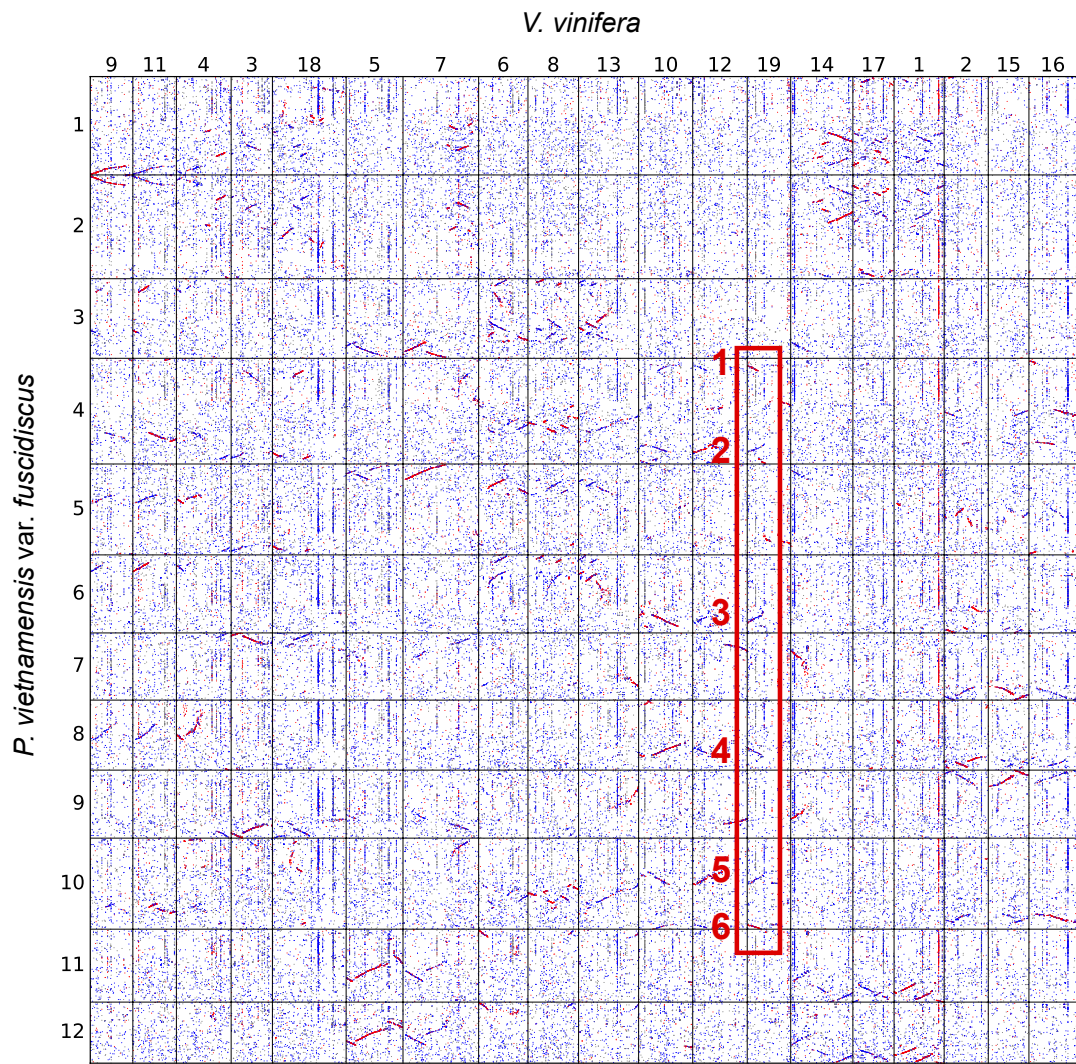

**Figure S8** Synteny dot plot between *P. vietnamensis* var. *fuscidiscus* and *V. vinifera*. The red box highlighted regions between *V. vinifera* and *P. vietnamensis* var. *fuscidiscus* with a ratio of 1:6.

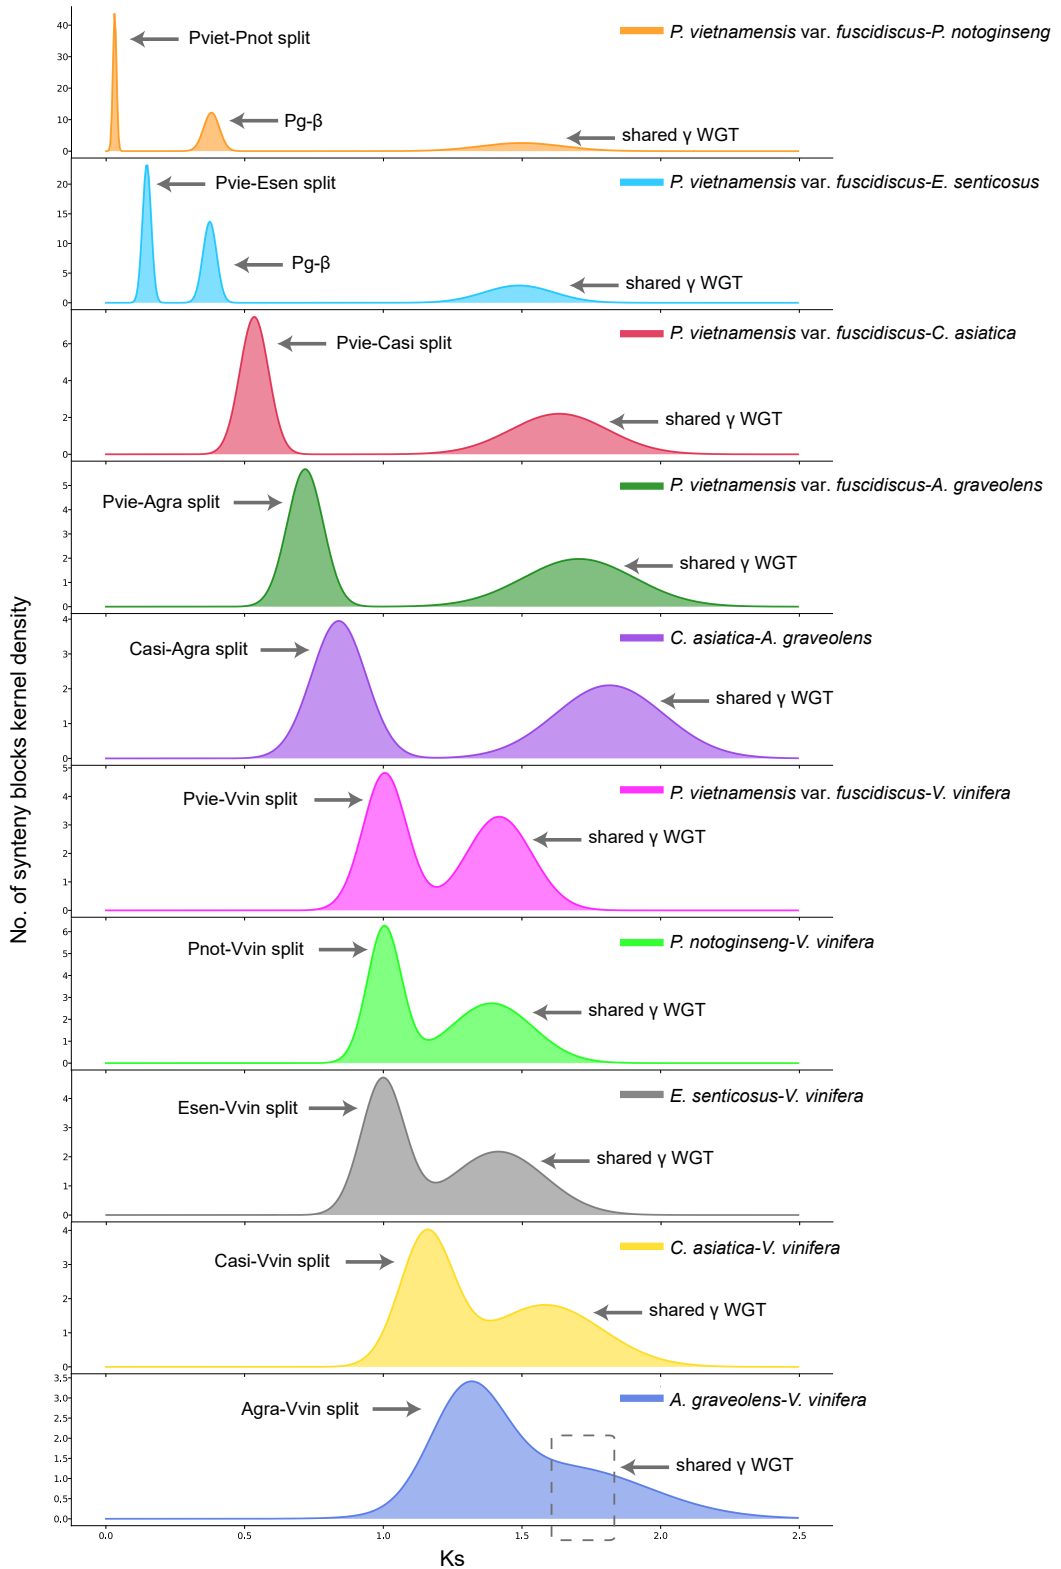

**Figure S9**  $K_s$  distribution of interspecific collinear blocks.  $K_s$  peaks of speciation and shared polyploidizations between the studied species were labeled. Pvie: *P. vietnamensis* var. *fuscidiscus*, Pnot: *P. notoginseng*, Esen: *E. senticosus*, Casi: *C. asiatica*, Agra: *A. graveolens*, Vvin: *V. vinifera*.

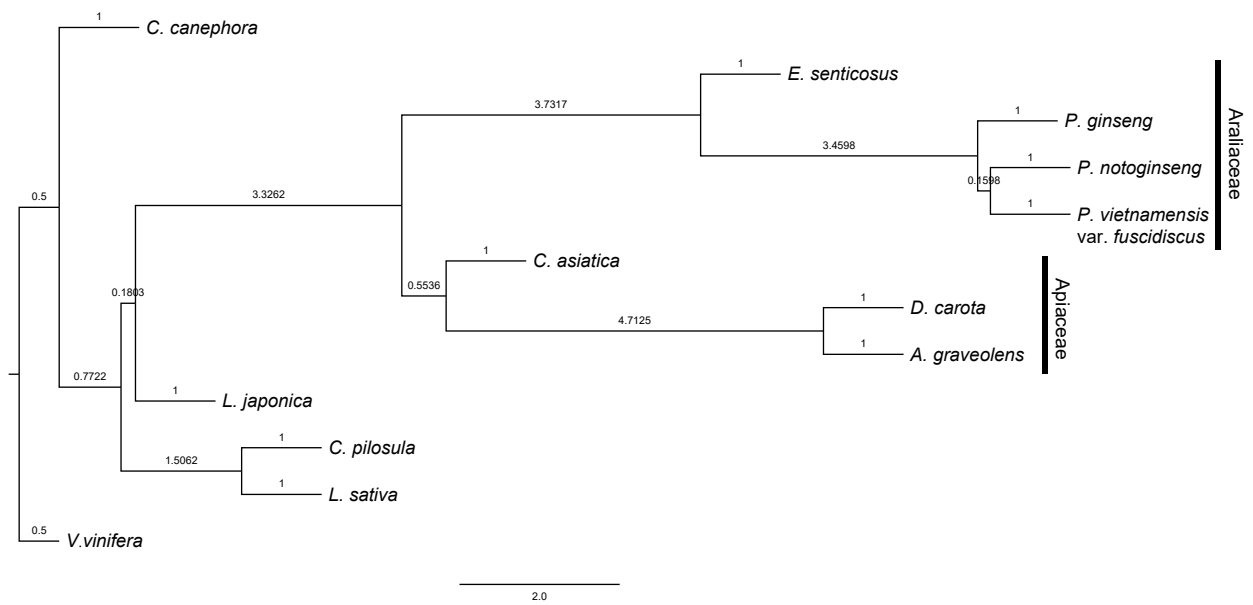

**Figure S10** Synteny analyses. (A) Synteny dot plot between *P. notoginseng* and *E. senticosus*. *P. notoginseng* genome version PBJ-2021 (Yang *et al.*, 2021a). For *P. notoginseng*, number 13-18 represent Scaffold 13-18. (B) Synteny dot plot between *P. notoginseng* (updated by this study) and *E. senticosus*.

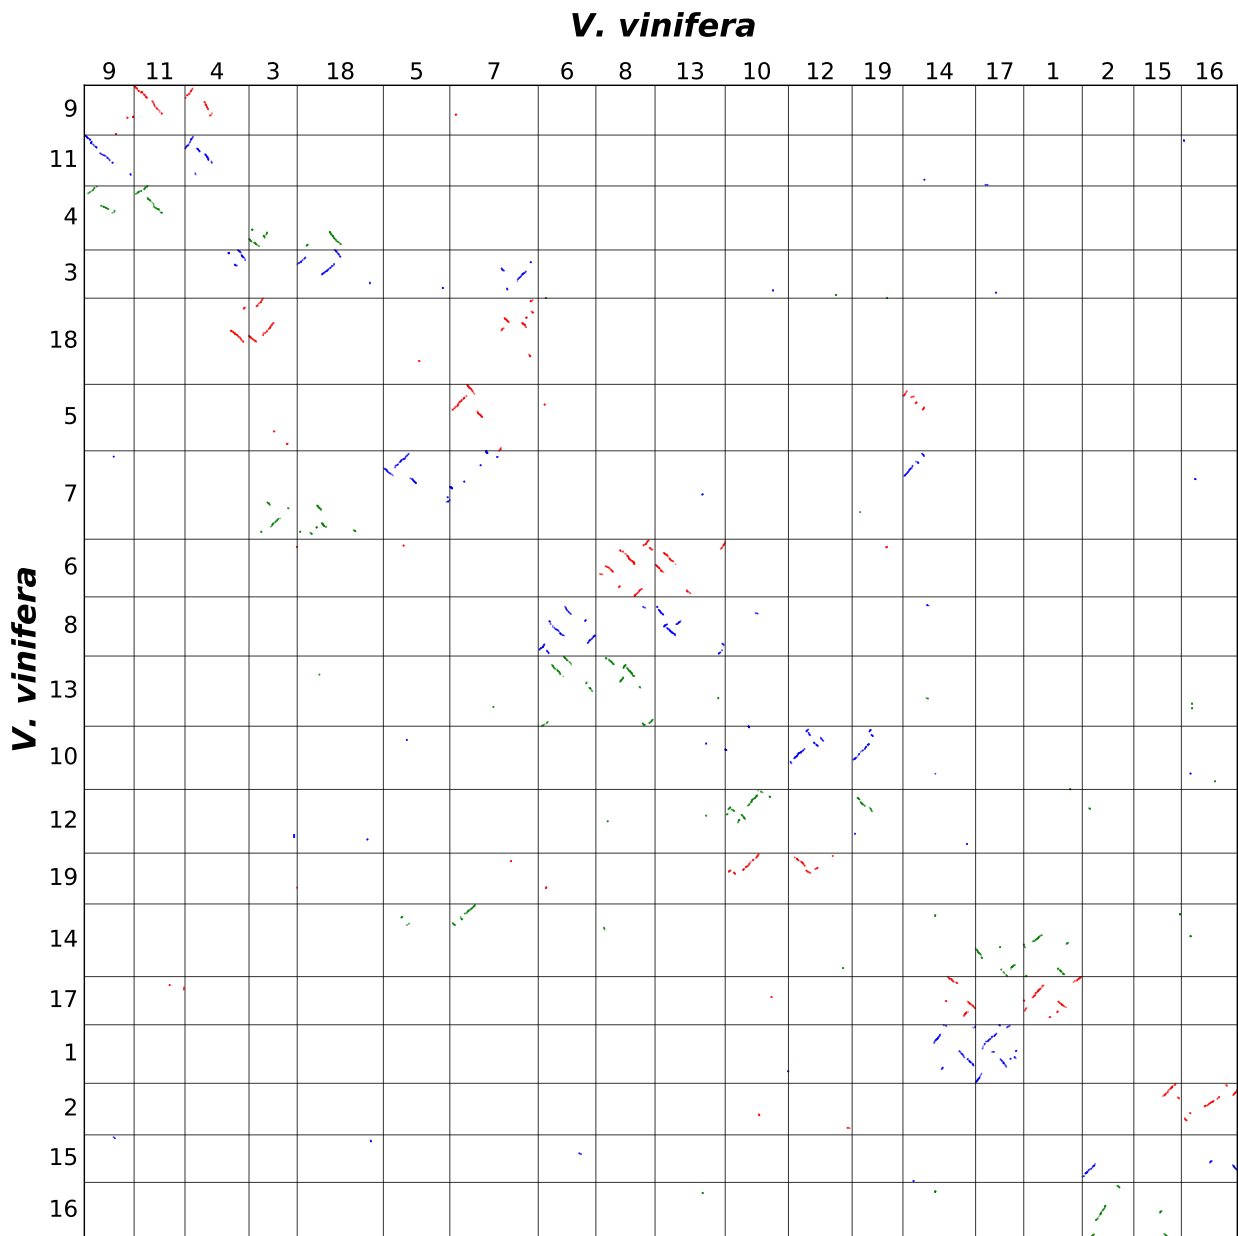

**Figure S11** Collinear gene extraction of *V. vinifera*. The three candidate subsets resulted from polyploidizations were highlighted using red (S1), blue (S2), green (S3).

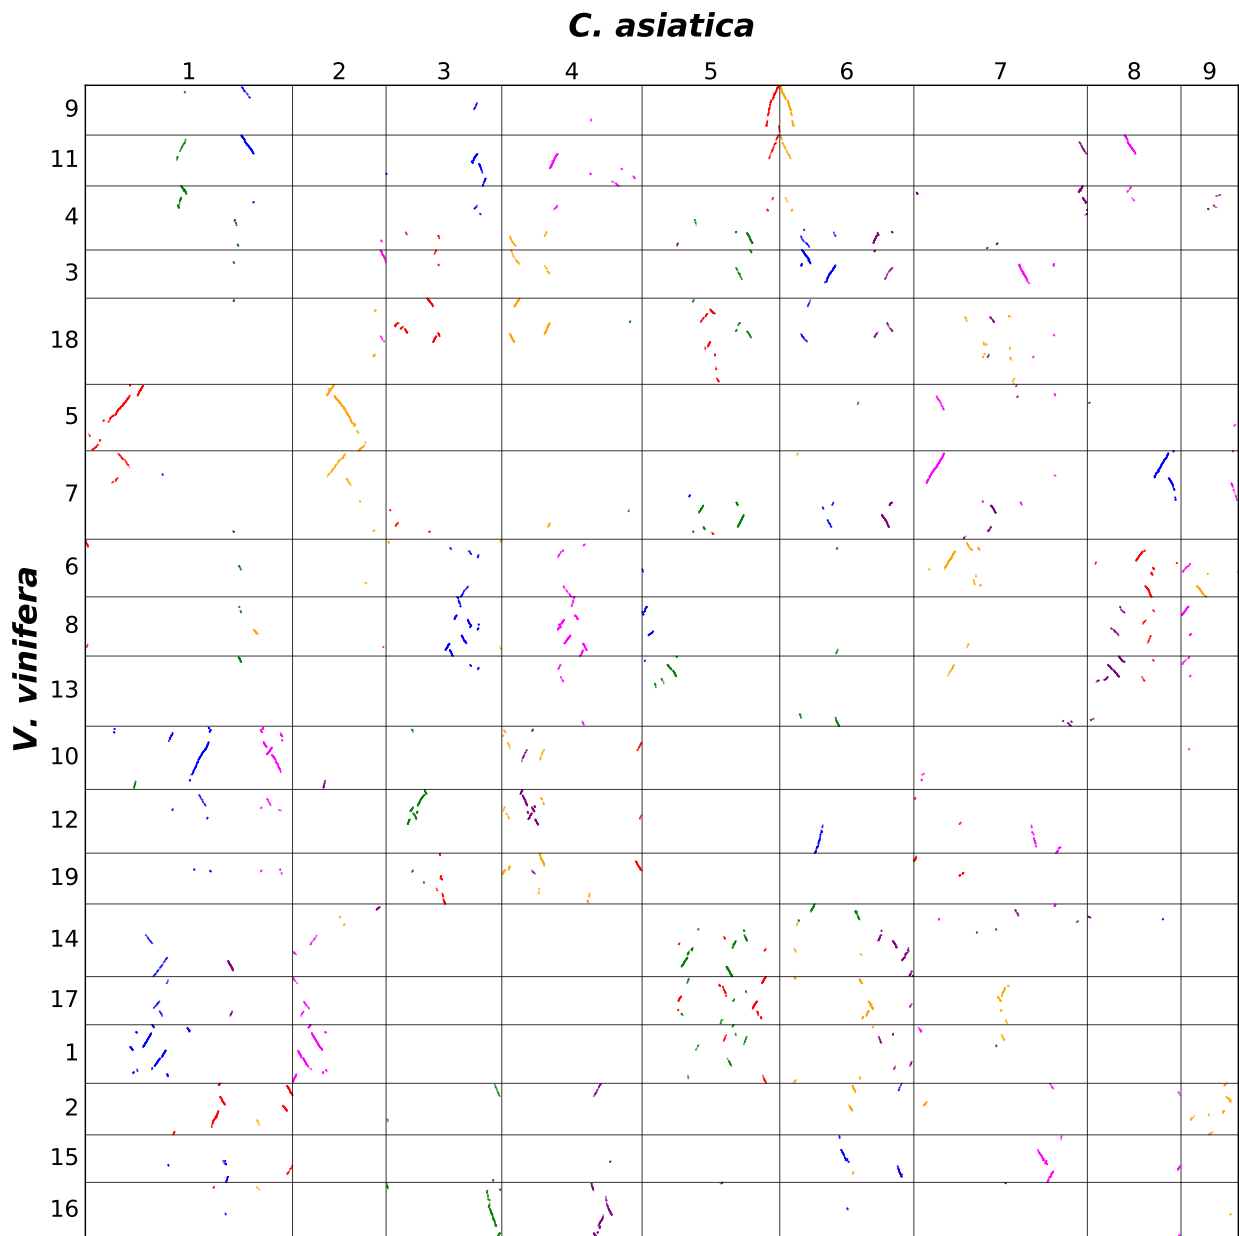

**Figure S12** Collinear gene extraction between *V. vinifera* and *C. asiatica*. The six candidate subsets resulted from polyploidizations were highlighted using red (S1), blue (S2), green (S3), orange (S4), fuchsia (S5), purple (S6).



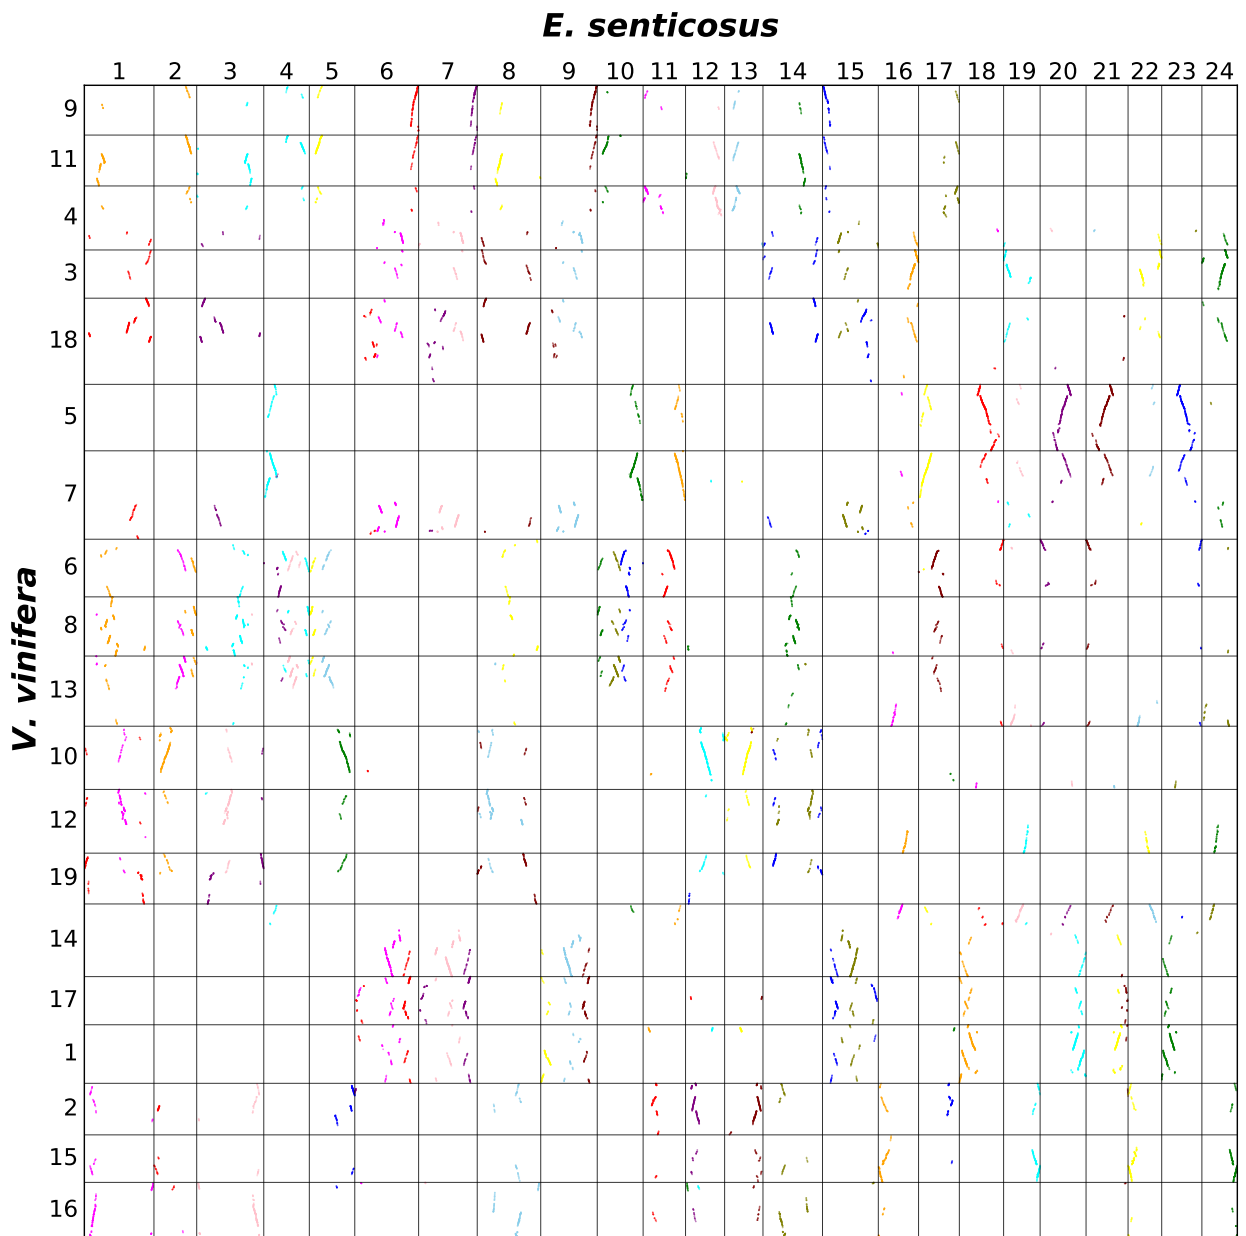

**Figure S13** Collinear gene extraction between *V. vinifera* and *E. senticosus*. The 12 candidate subsets resulted from polyploidizations were highlighted using red (S1), blue (S2), green (S3), olive (S4), orange (S5), fuchsia (S6), purple (S7), cyan (S8), pink (S9), maroon (S10), yellow (S11), skyblue (S12).

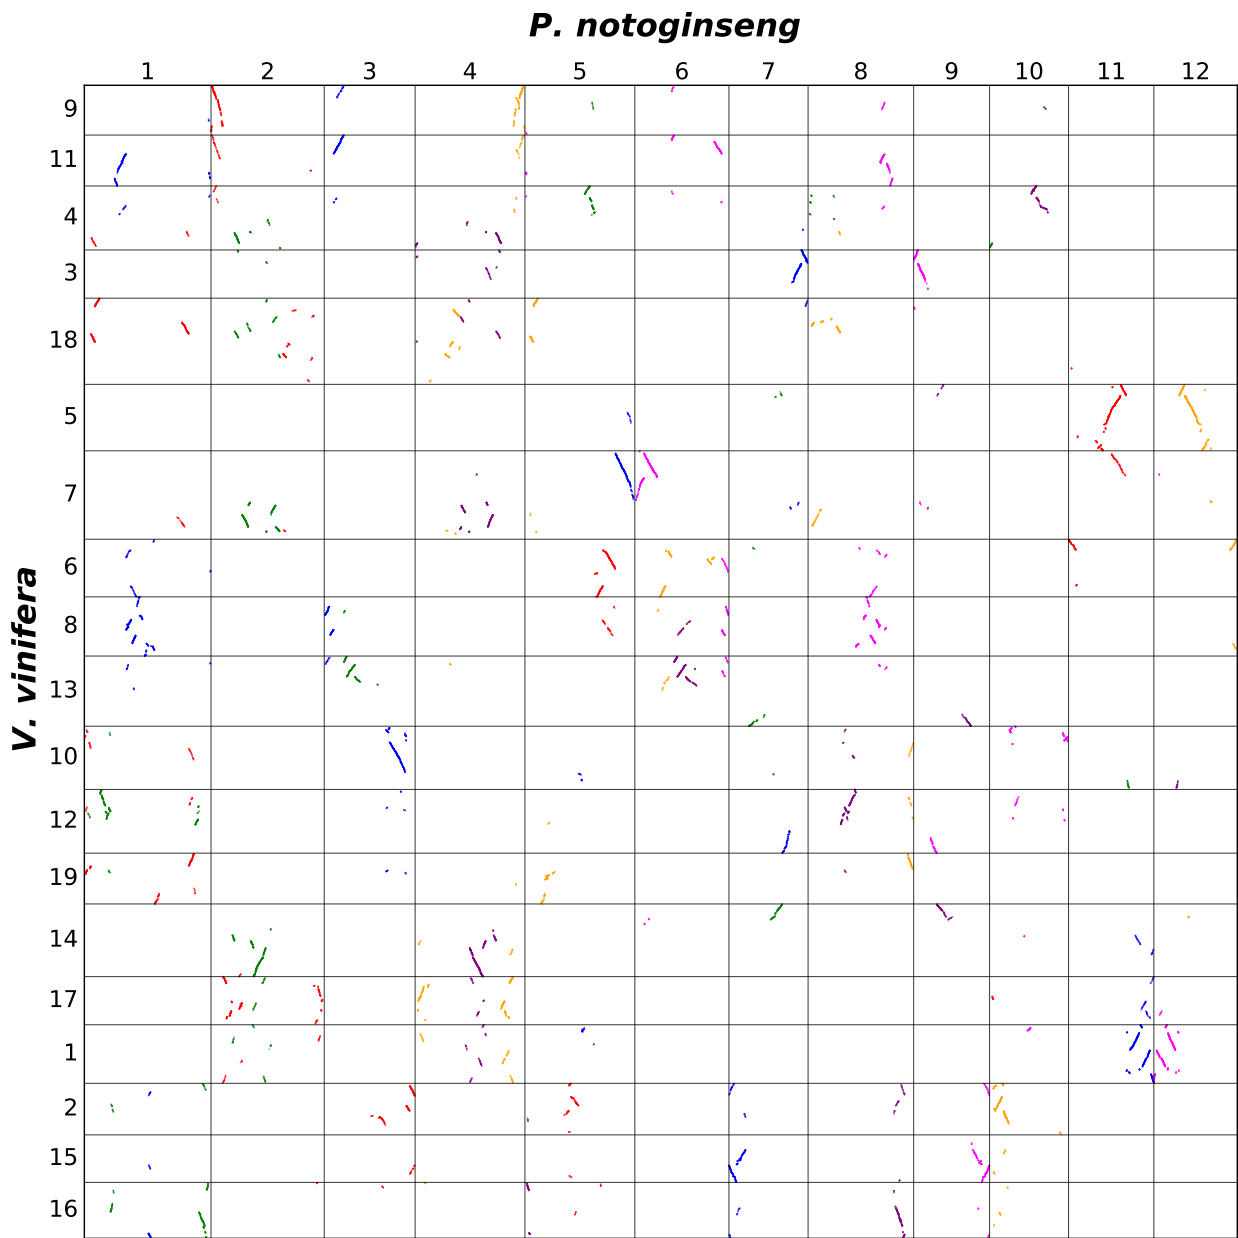

**Figure S14** Collinear gene extraction between *V. vinifera* and *P. notoginseng*. The six candidate subsets resulted from polyploidizations were highlighted using red (S1), blue (S2), green (S3), orange (S4), fuchsia (S5), purple (S6).

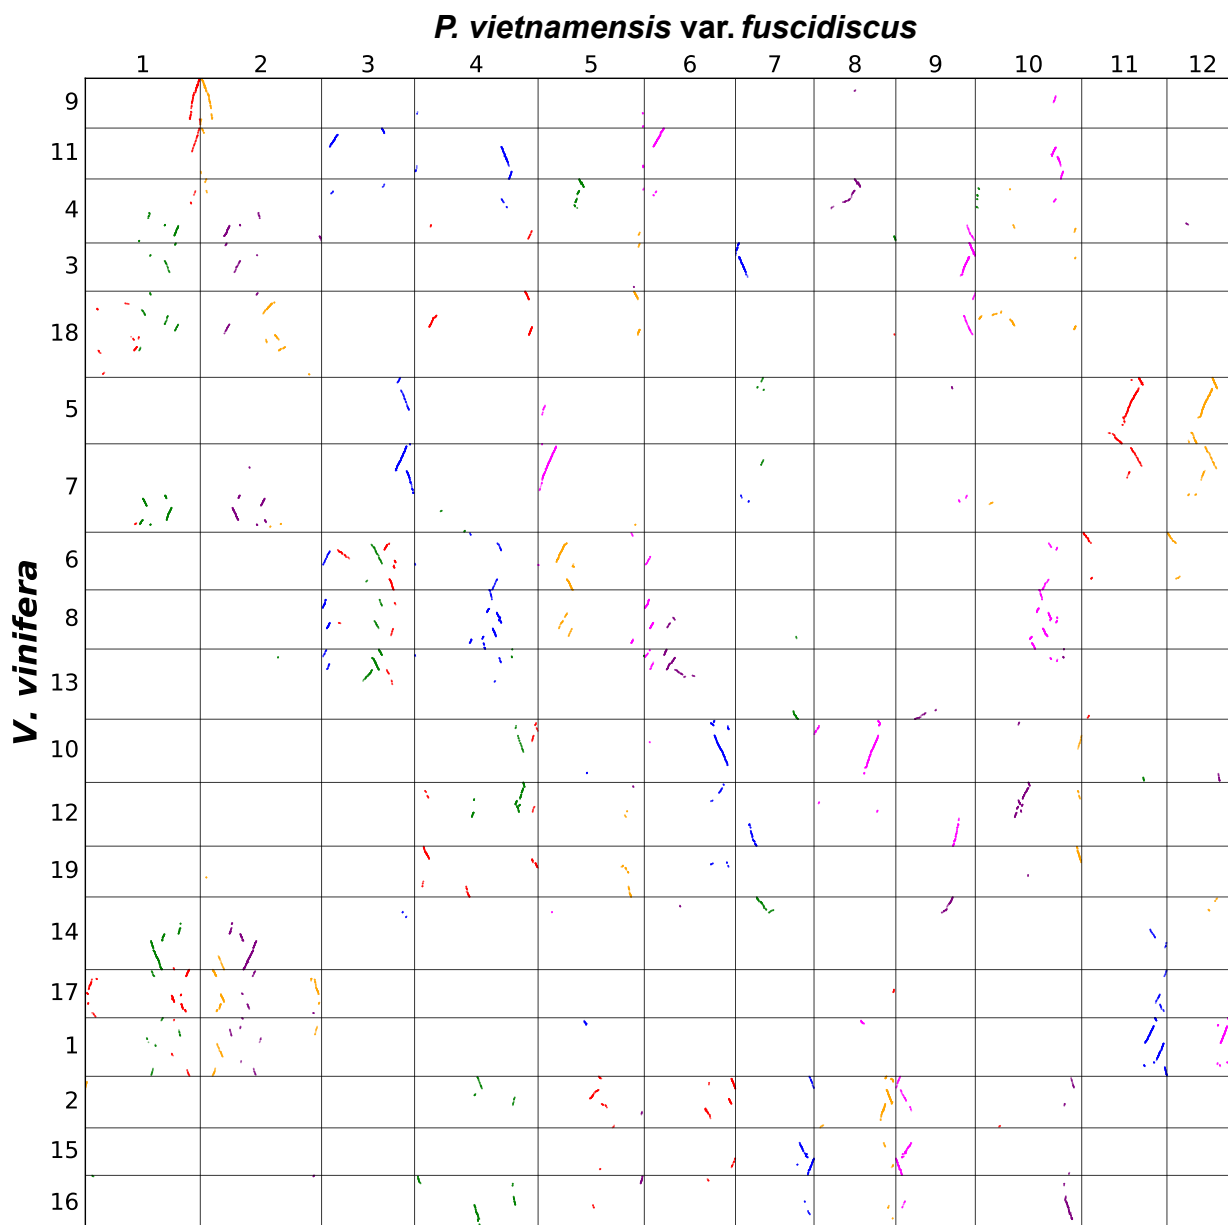

**Figure S15** Collinear gene extraction between *V. vinifera* and *P. vietnamensis* var. *fuscidiscus*. The six candidate subsets resulted from polyploidizations were highlighted using red (S1), blue (S2), green (S3), orange (S4), fuchsia (S5), purple (S6).

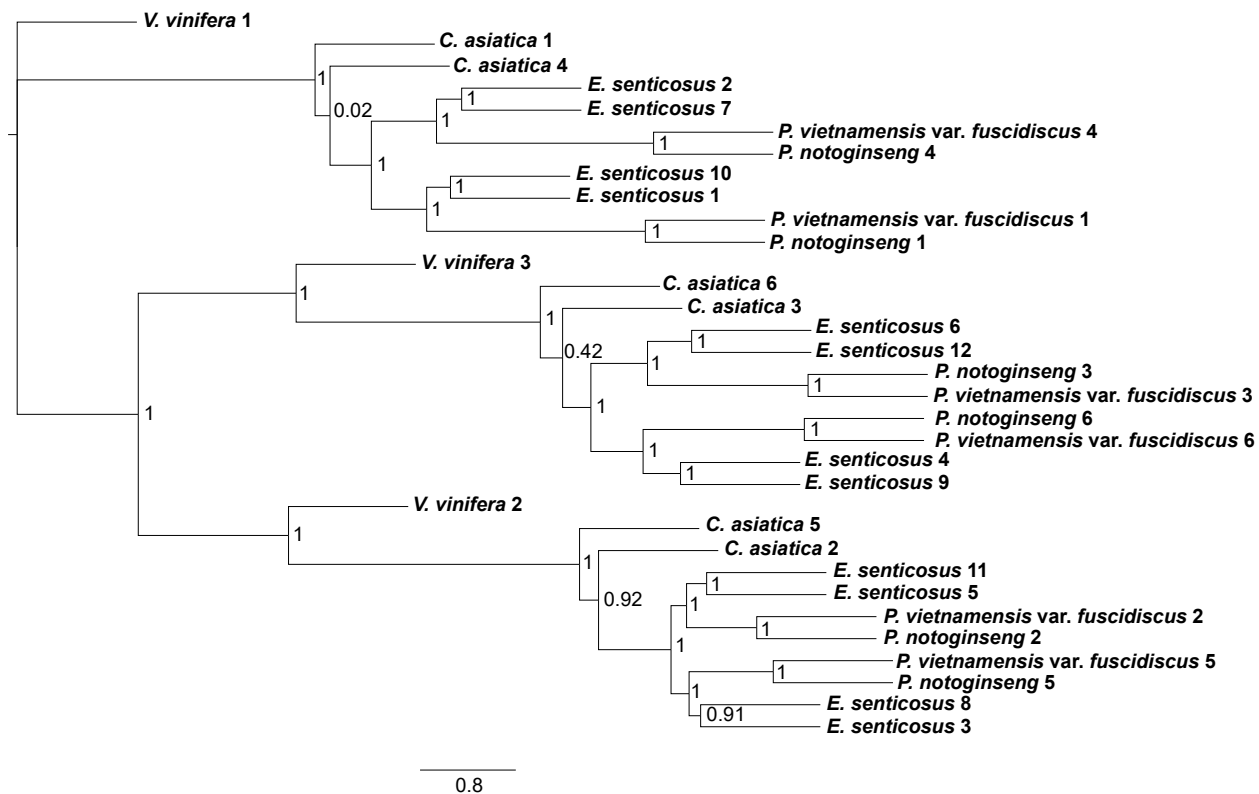

**Figure S16** Synteny-based coalescent species tree including *V. vinifera* and four Apiales species. Branch lengths are shown in coalescent units. The numbers of each node represents the local posterior probabilities. Since the ASTRAL tree leaves the branch length of terminal branches empty, the length of terminal branches were all set as one.

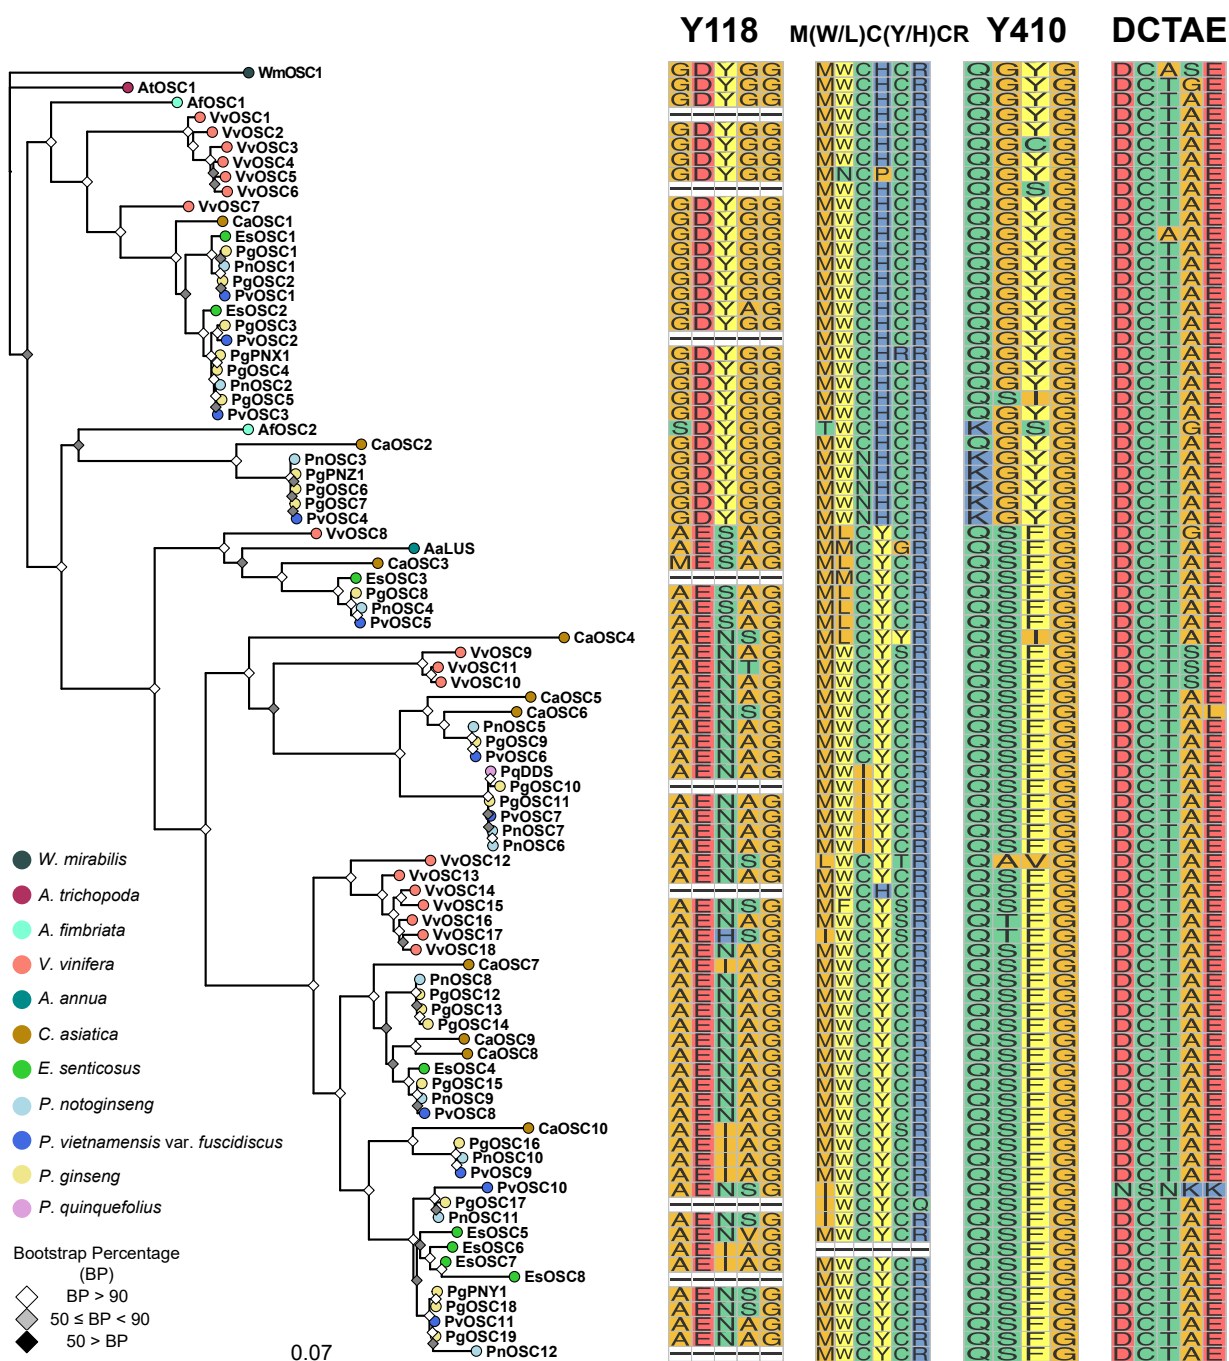

**Figure S17** Maximum likelihood phylogenetic tree of OSCs with motifs aligned. Four deterministic motifs were visualized including Y118, M(W/L)C(Y/H)CR, Y410, and DCTAE.

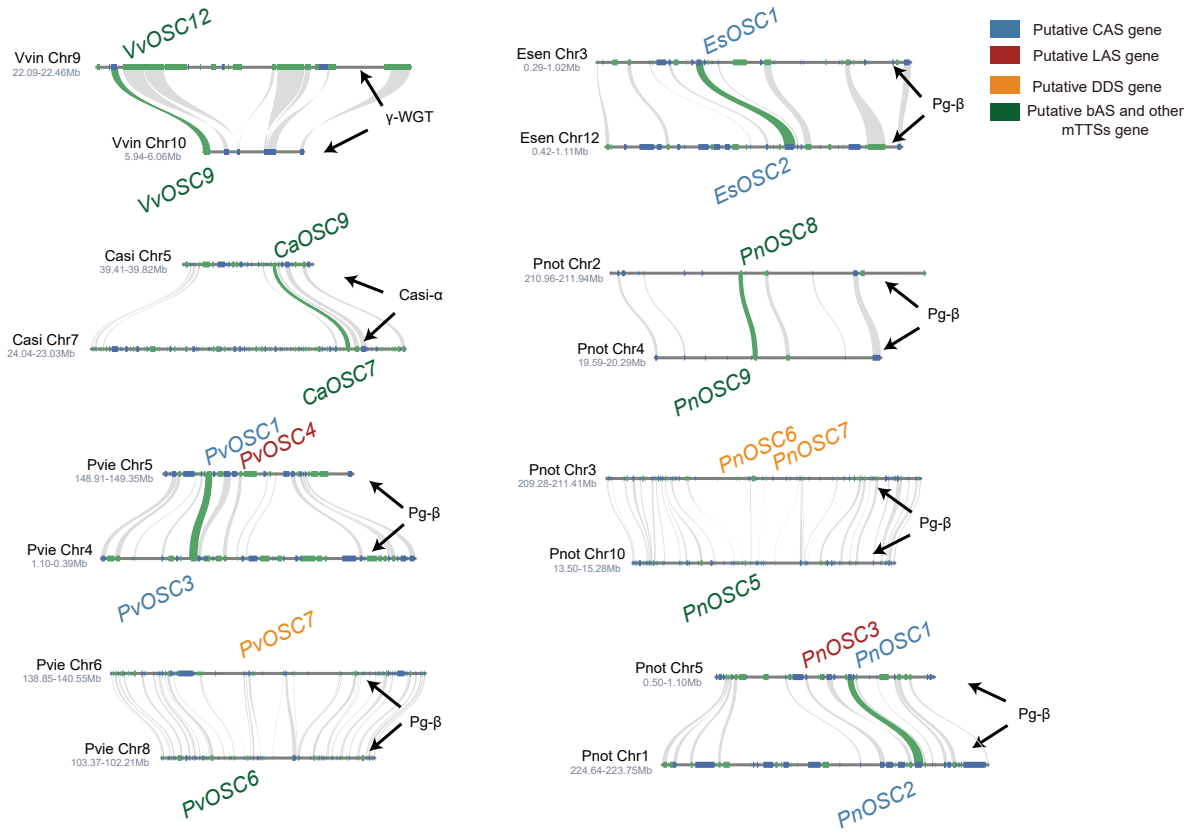

**Figure S18** Intraspecific micro-synteny relations of OSC genes. Direct collinear relations for OSC genes were highlighted in green (Vvin: *V. vinifera*, Casi: *C. asiatica*, Pvie: *P. vietnamensis* var. *fuscidiscus*, Esen: *E. senticosus*, Pnot: *P. notoginseng*).

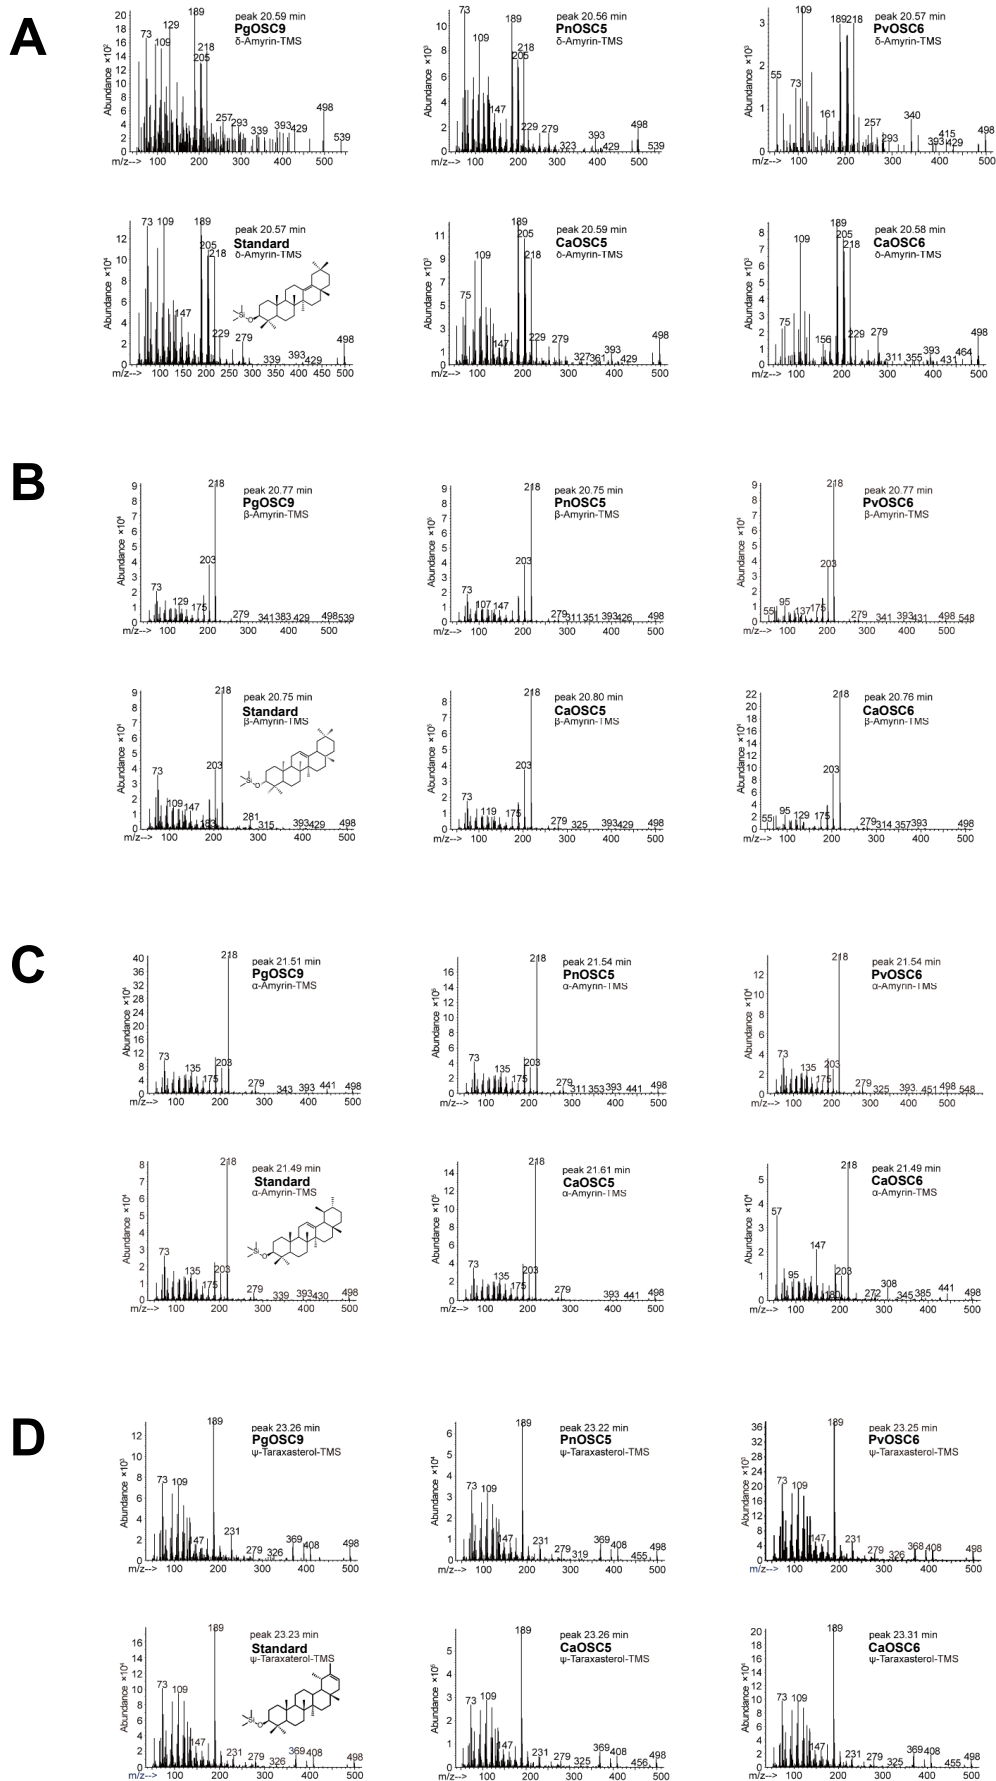

**Figure S19** Mass spectra identification for compound 1 ( $\delta$ -amyrin) (A), compound 2 ( $\beta$ -amyrin) (B), compound 3 ( $\alpha$ -amyrin) (C), and compound 5 ( $\psi$ -taraxasterol) (D).

**A**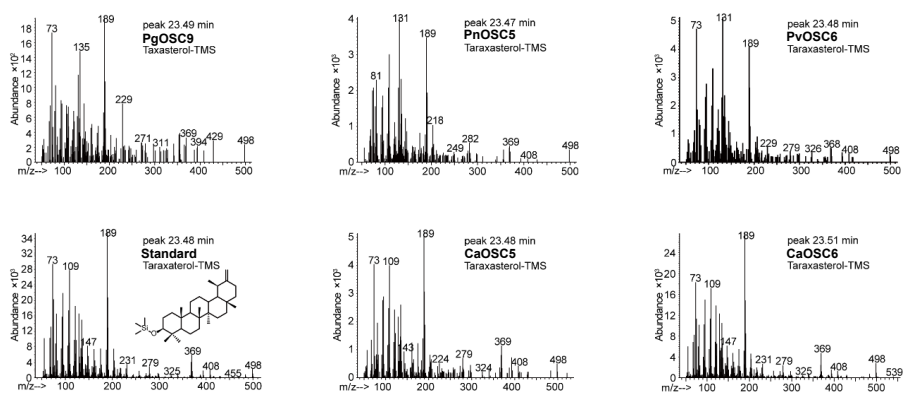**B**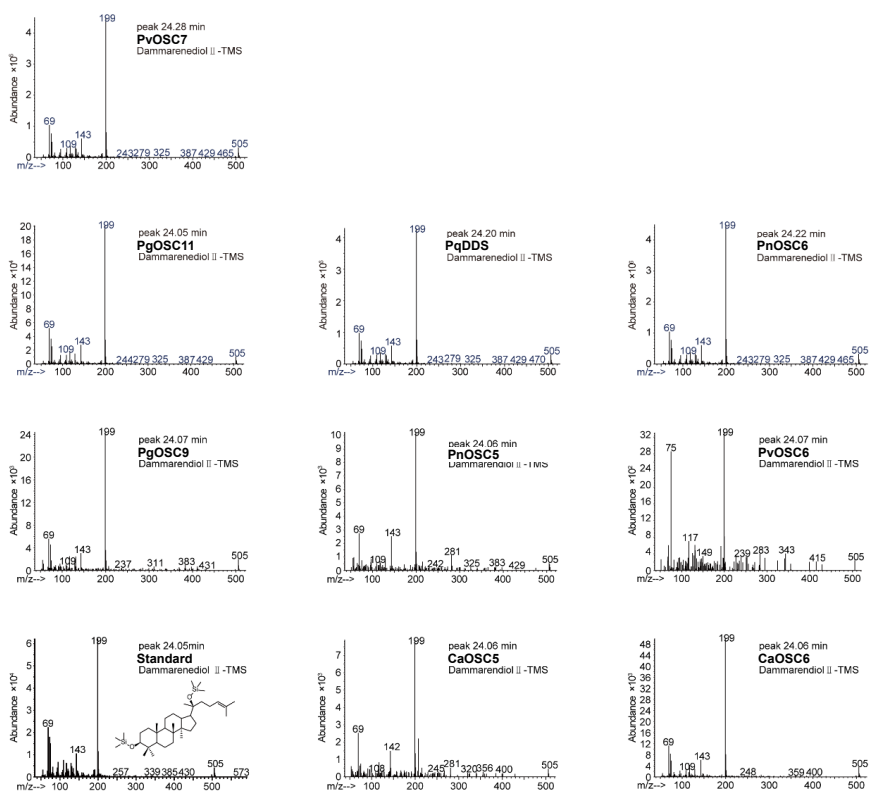

**Figure S20** Mass spectra identification for compound 6 (taraxasterol) (A) and compound 7 (dammarendiol-II) (B).



**A**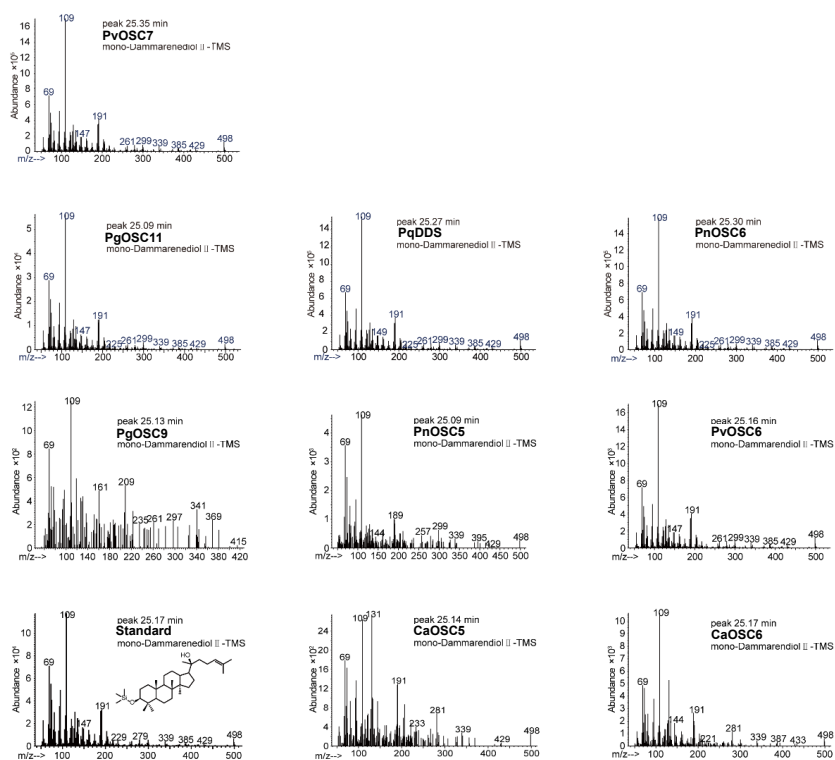**B**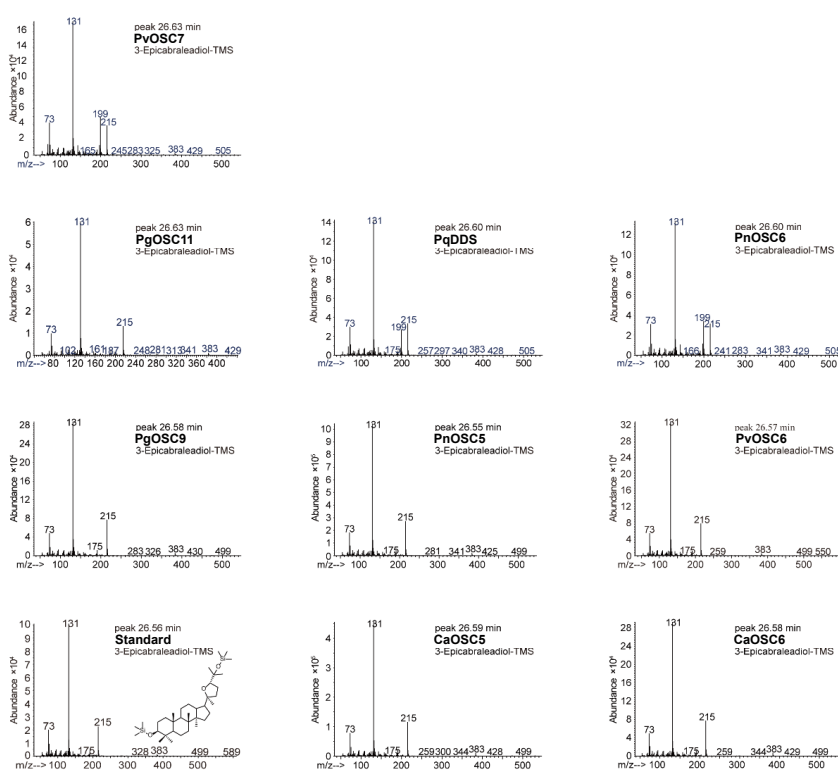

**Figure S21** Mass spectra identification for compound # (A) and compound 8 (3-epicabraleadiol) (B). Compound # was identified as the mono-TMS derivative of dammarendiol-II.

**A**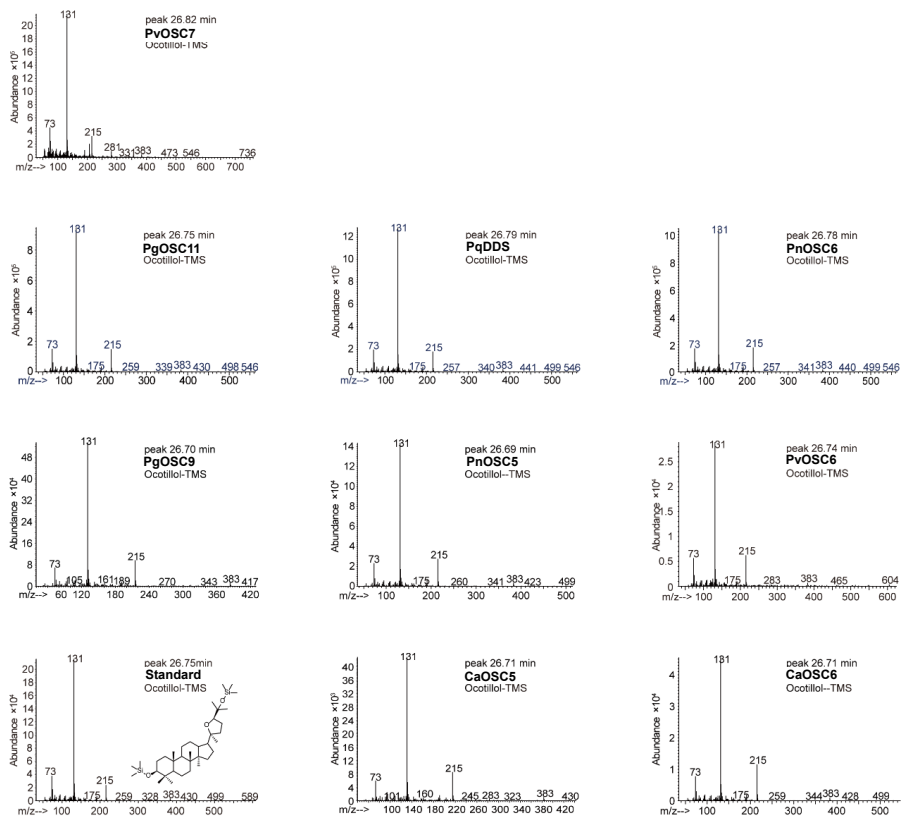**B**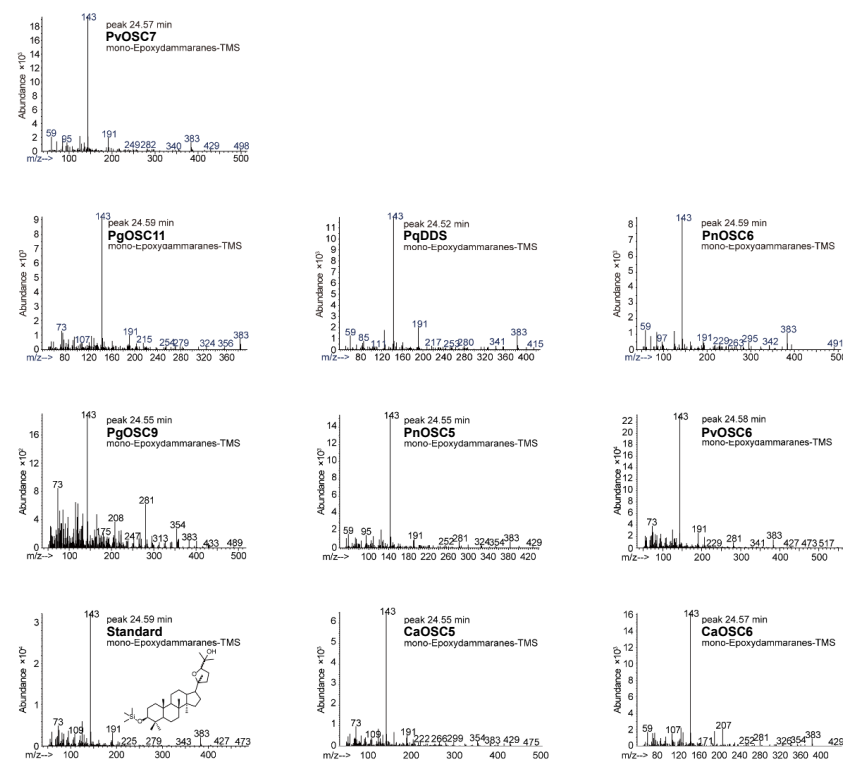

**Figure S22** Mass spectra identification for compound 9 (ocotillol) (A) and compound \* (B). Compound \* was identified as the mono-TMS derivatives of epoxydammaranes (compound 8 and compound 9).

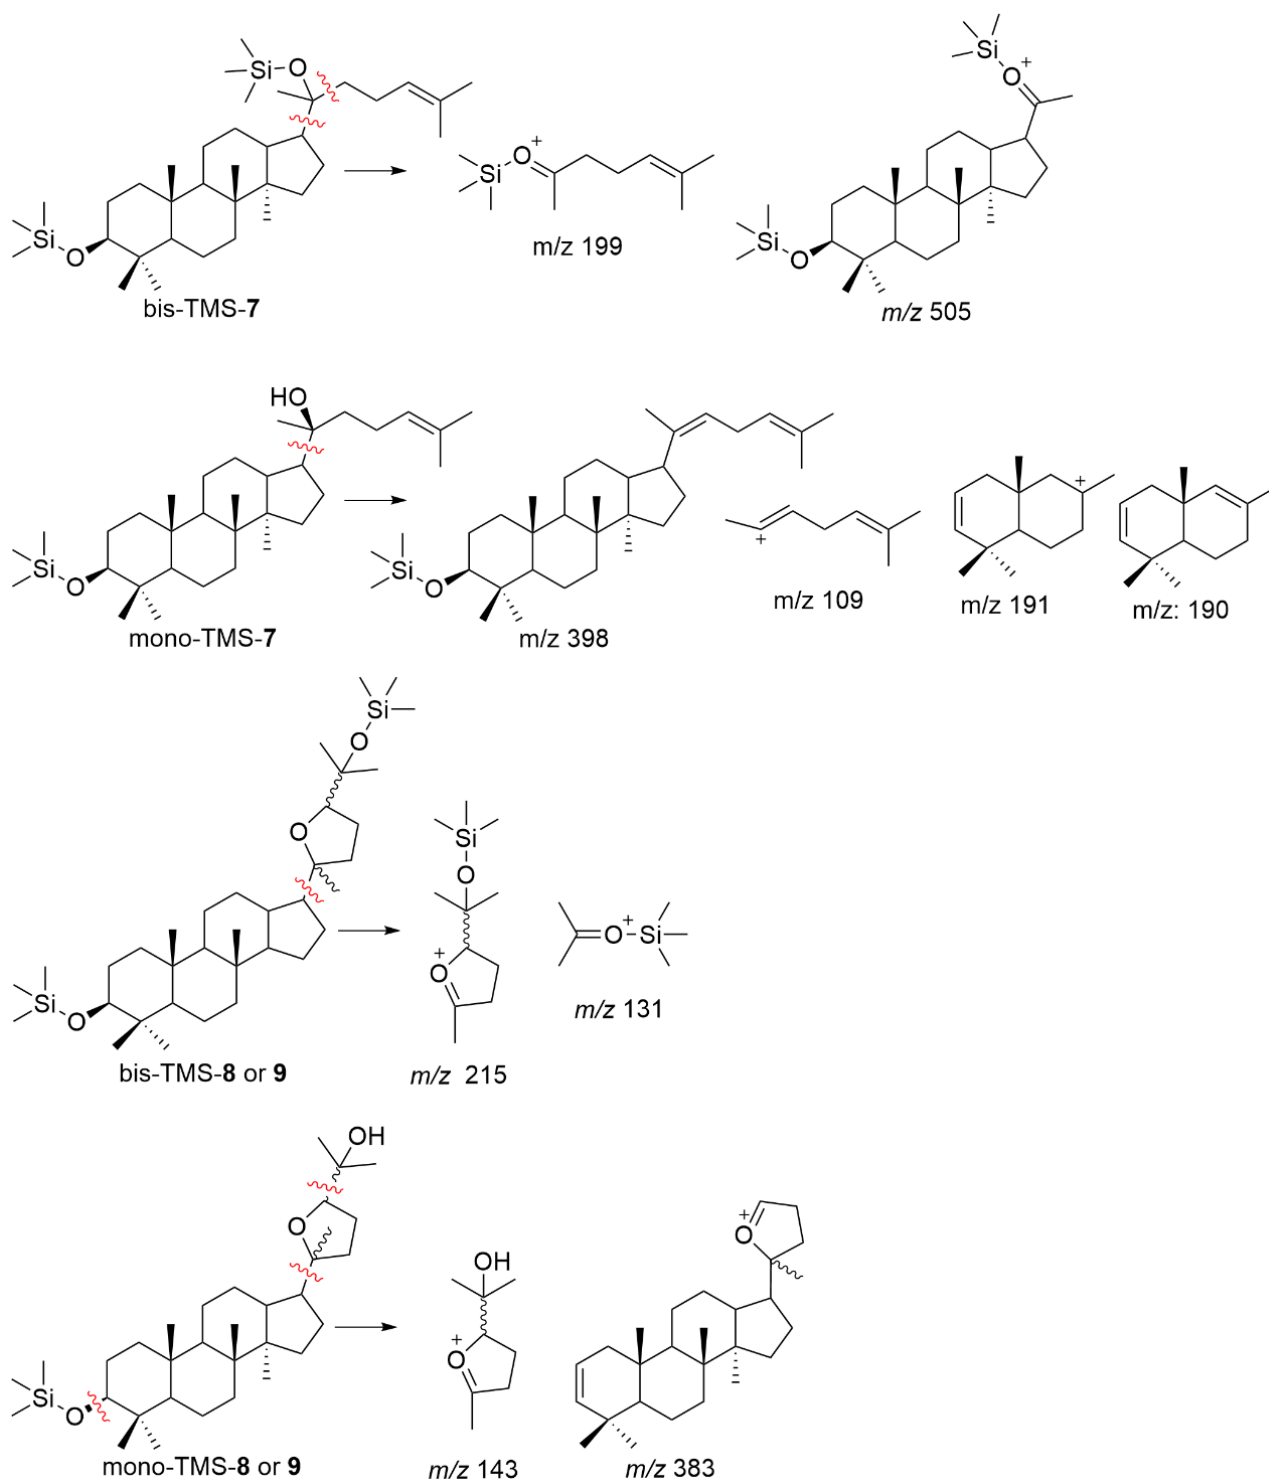

**Figure S23** Proposed fragmentation patterns for compound 7, 8, and 9.

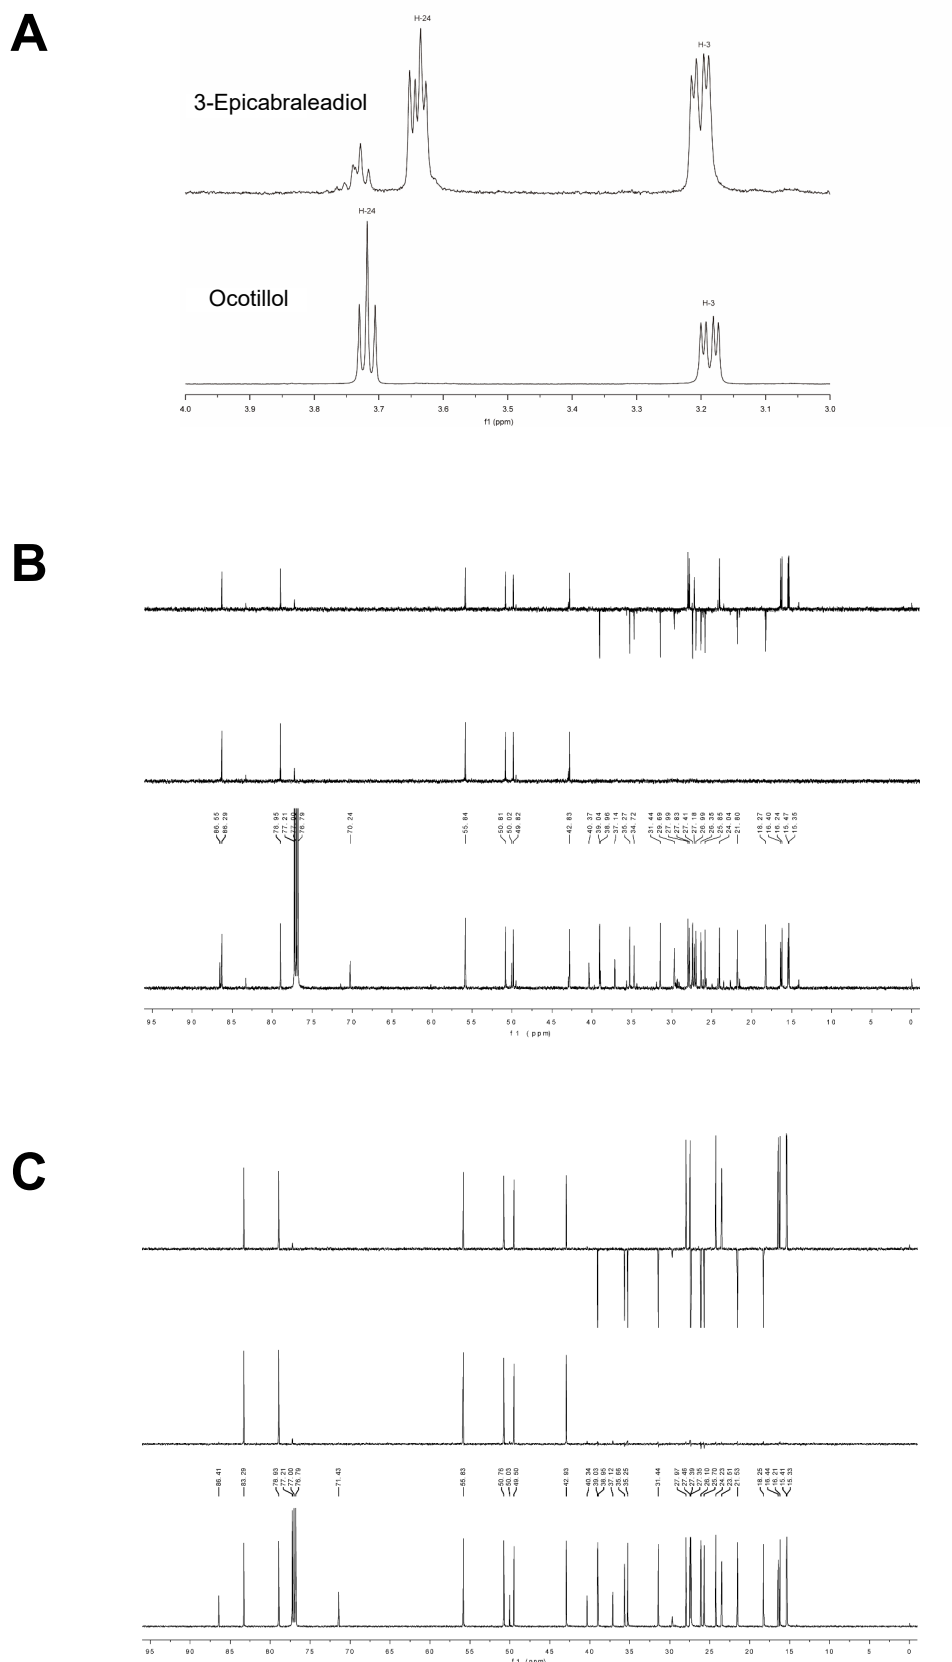

**Figure S24** (A)  $^1\text{H}$  NMR spectra of compound 8 (3-epicabraleadiol) and 9 (ocotillo). (B)  $^{13}\text{C}$  NMR and DEPT spectra of compound 8 measured at 150 MHz in  $\text{CDCl}_3$ . (C)  $^{13}\text{C}$  NMR and DEPT spectra of compound 9 measured at 150 MHz in  $\text{CDCl}_3$ .

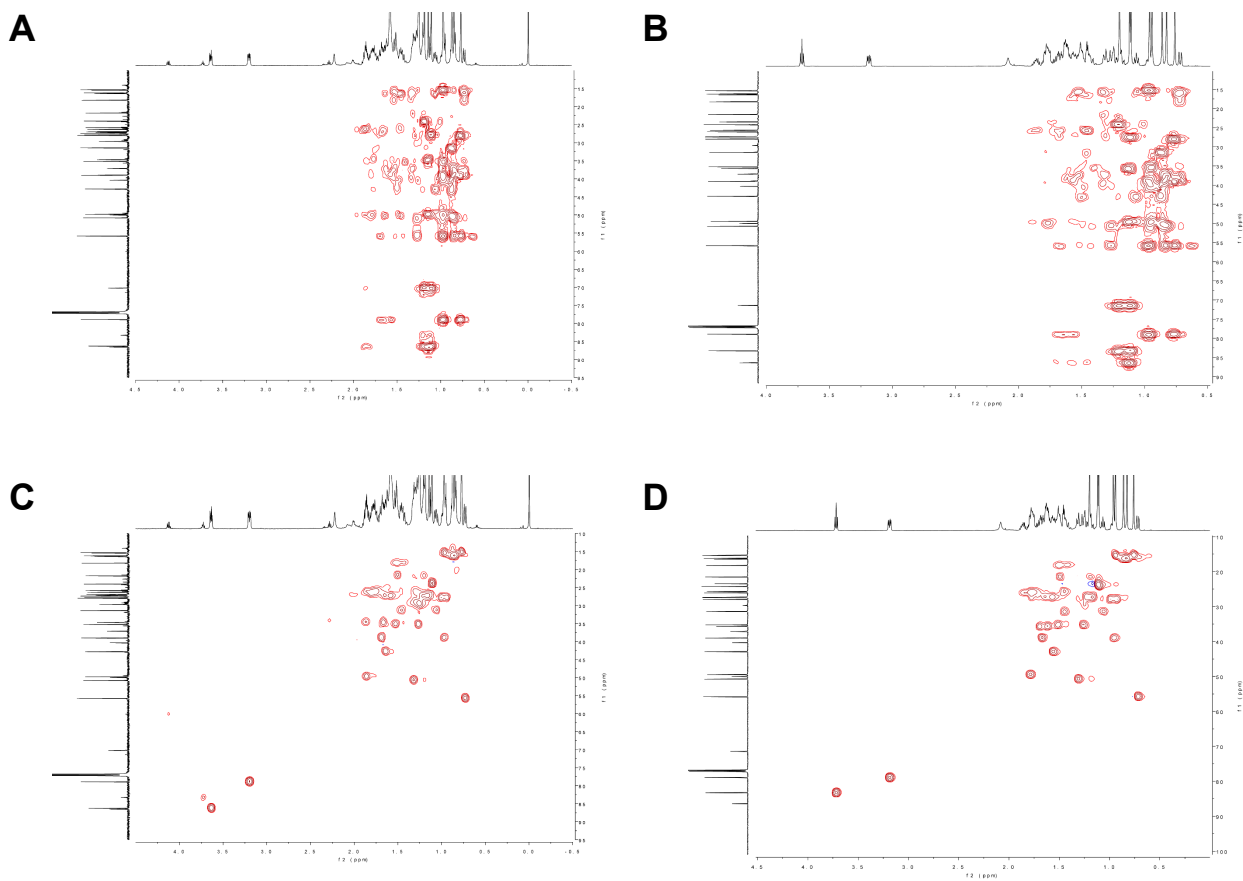

**Figure S25** (A) HMBC spectrum of compound 8 measured at 600 MHz in  $\text{CDCl}_3$ . (B) HMBC spectrum of compound 9 measured at 600 MHz in  $\text{CDCl}_3$ . (C) HSQC spectrum of compound 8 measured at 600 MHz in  $\text{CDCl}_3$ . (D) HSQC spectrum of compound 9 measured at 600 MHz in  $\text{CDCl}_3$ .

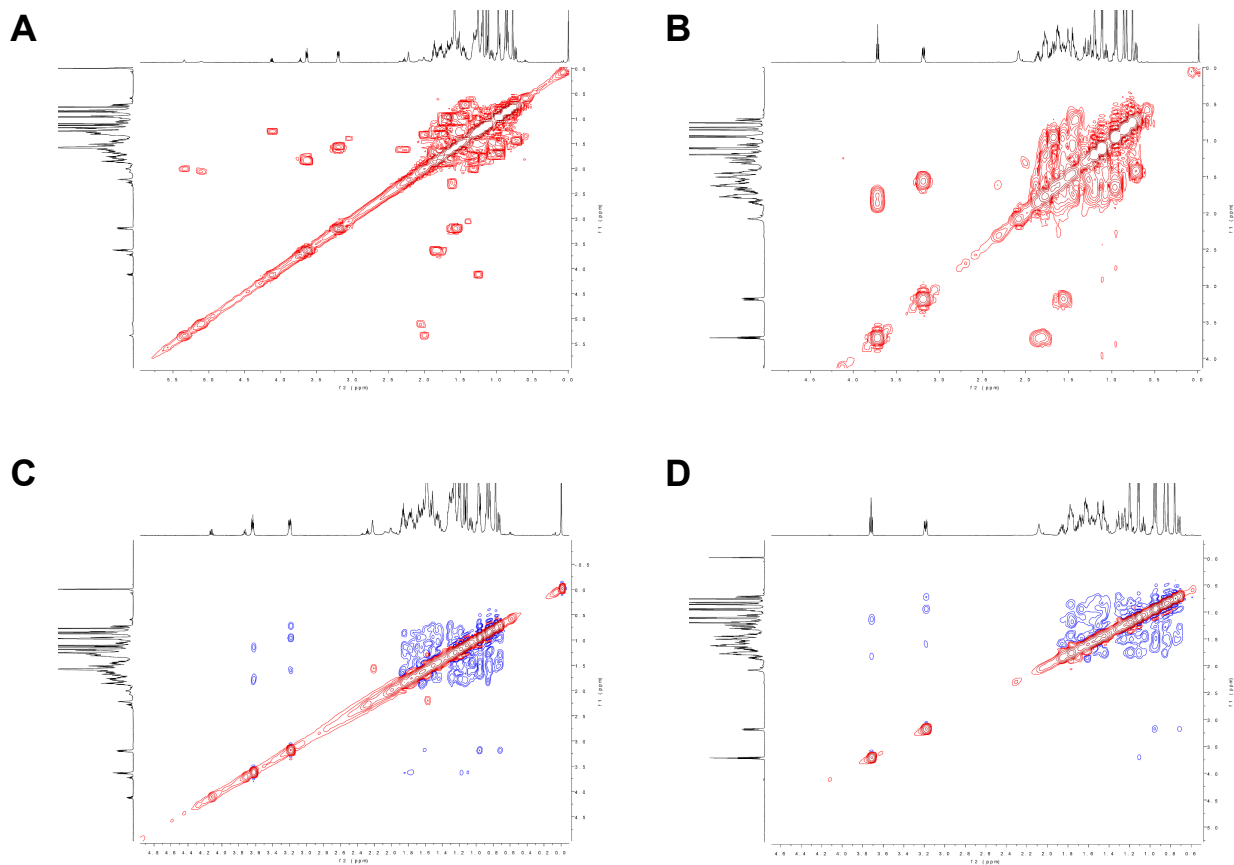

**Figure S26** (A)  $^1\text{H}$ - $^1\text{H}$  COSY spectrum of compound 8 measured at 600 MHz in  $\text{CDCl}_3$ . (B)  $^1\text{H}$ - $^1\text{H}$  COSY spectrum of compound 9 measured at 600 MHz in  $\text{CDCl}_3$ . (C)  $^1\text{H}$ - $^1\text{H}$  ROESY spectrum of compound 8 measured at 600 MHz in  $\text{CDCl}_3$ . (D)  $^1\text{H}$ - $^1\text{H}$  ROESY spectrum of compound 9 measured at 600 MHz in  $\text{CDCl}_3$ .

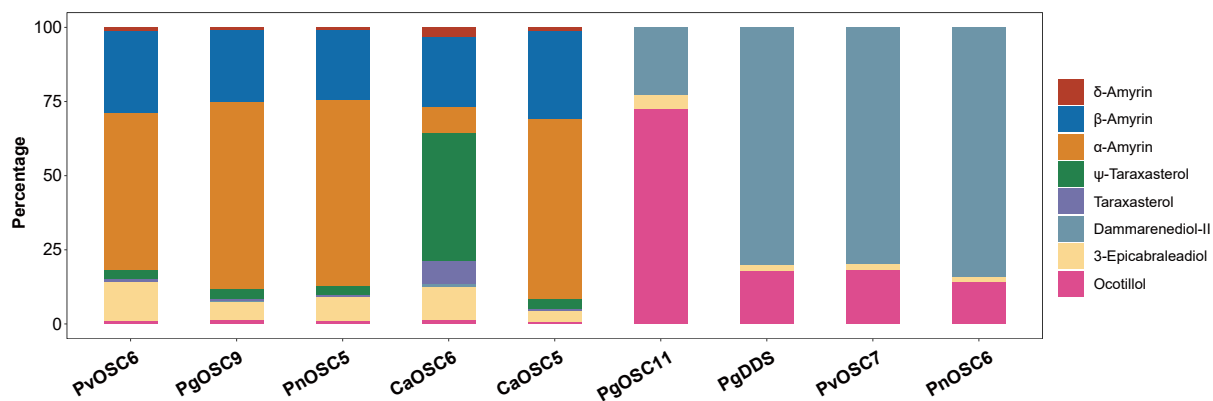

**Figure S27** Relative composition of identified products for the nine OSCs. The relative abundance of each compound is calculated based on the area of the corresponding peak.

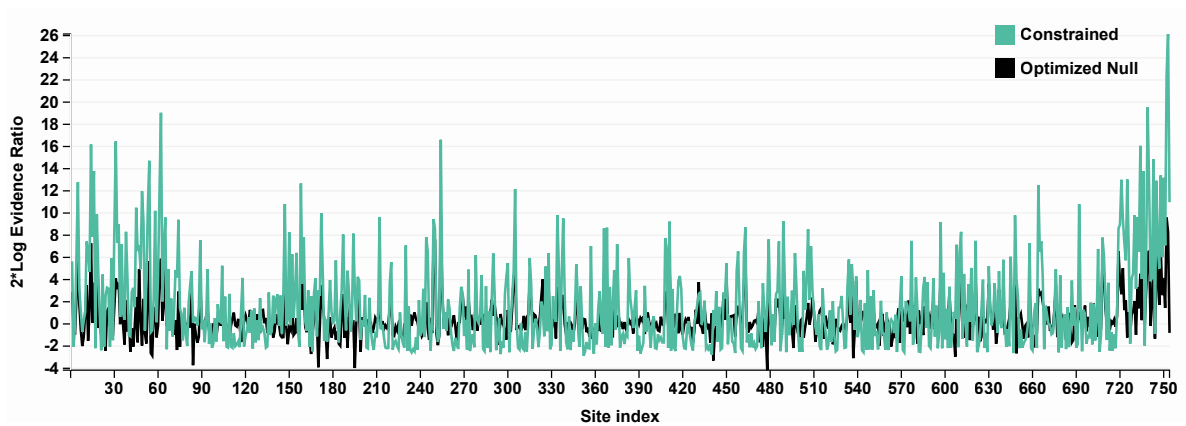

**Figure S28** Evidence ratio for BUSTED model in OSCs phylogeny. BUSTED with synonymous rate variation found evidence (LRT,  $P = 0.0000 \leq 0.05$ ) of gene-wide episodic diversifying selection. The Evidence ratio (y-axis) gives the likelihood ratio (on a log-scale) that the alternative model (selection along test branches) was a better fit to the data as compared to the null model.



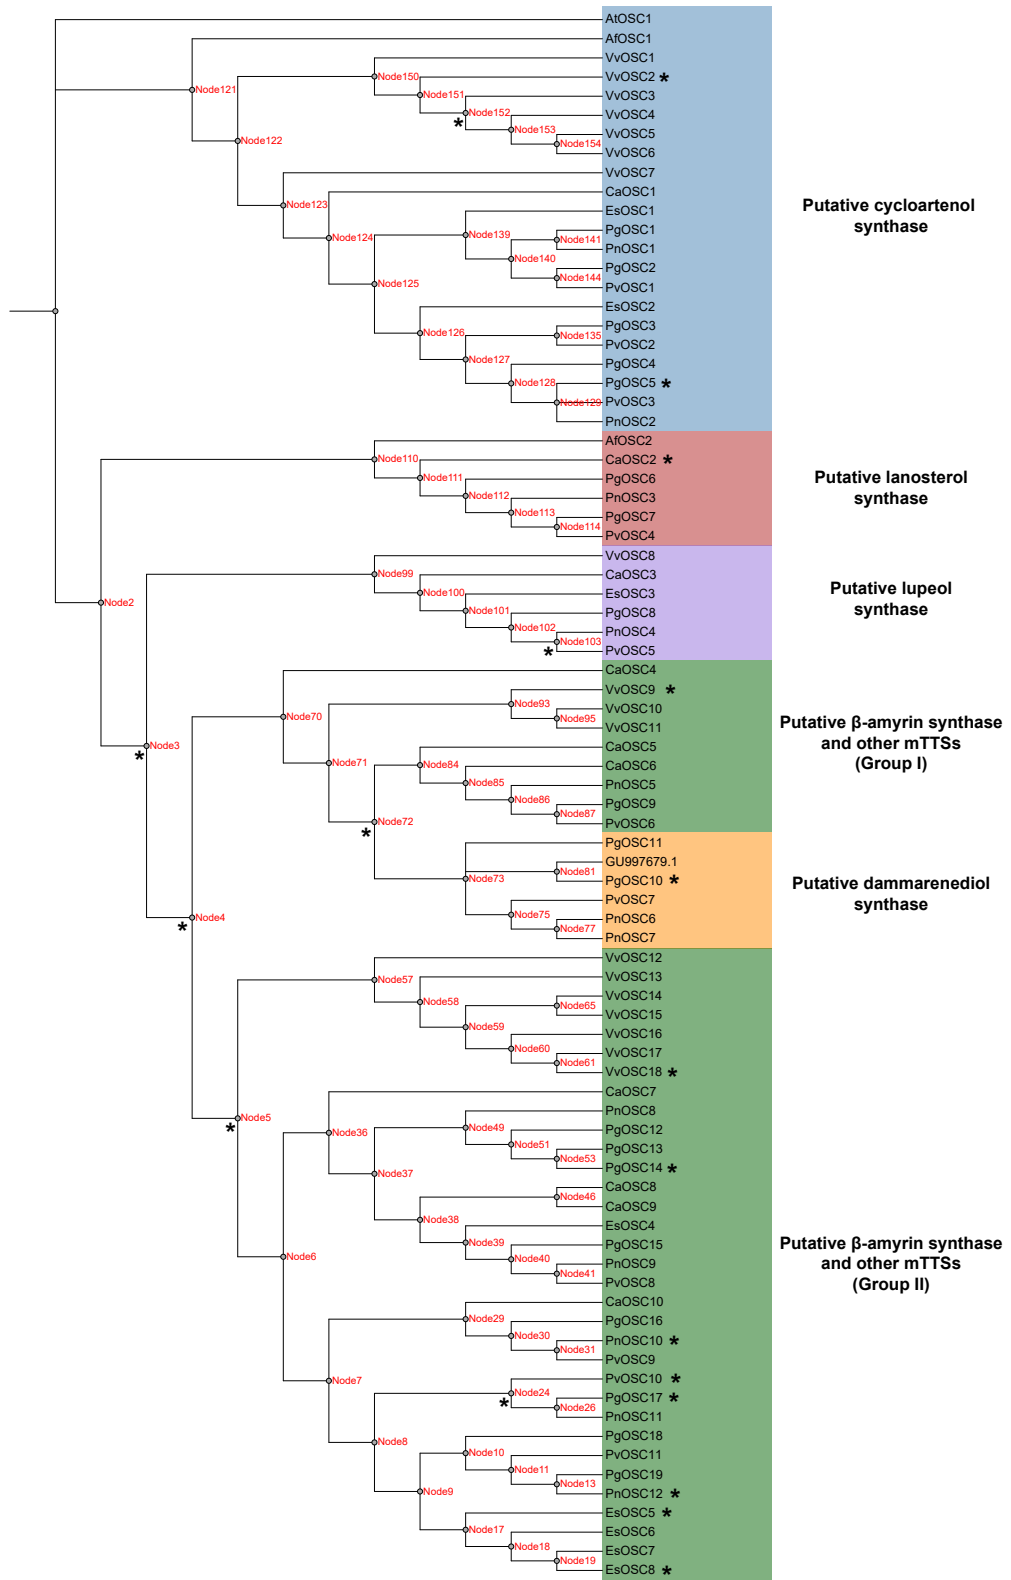

**Figure S29** Maximum likelihood phylogenetic tree for OSCs showing aBSREL result for branch specific selection. The branches and internal nodes showing evidence of episodic diversifying selection were labeled with asterisks.

**A**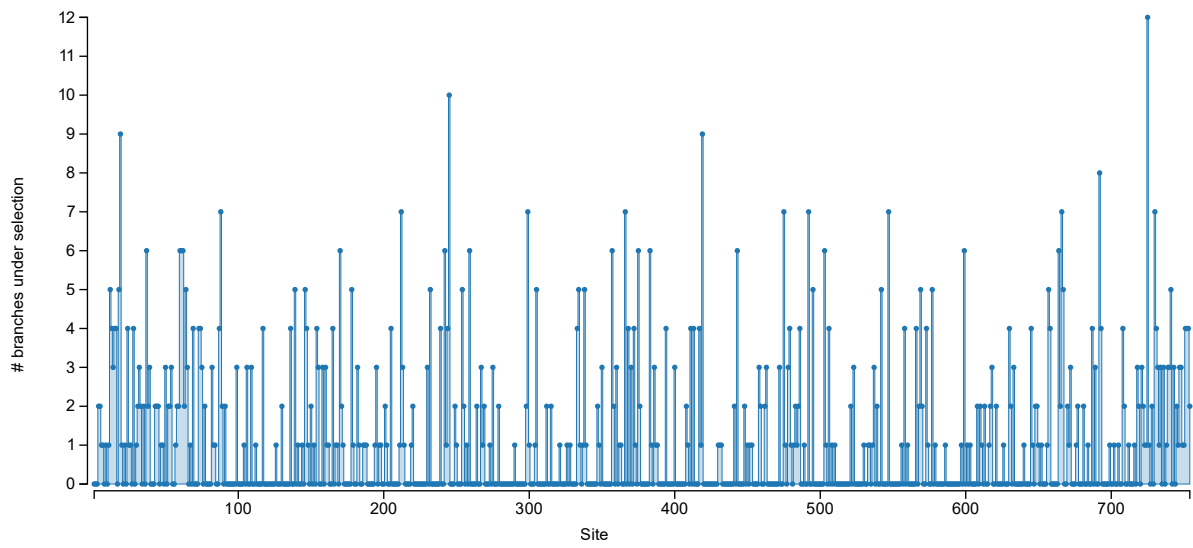**B**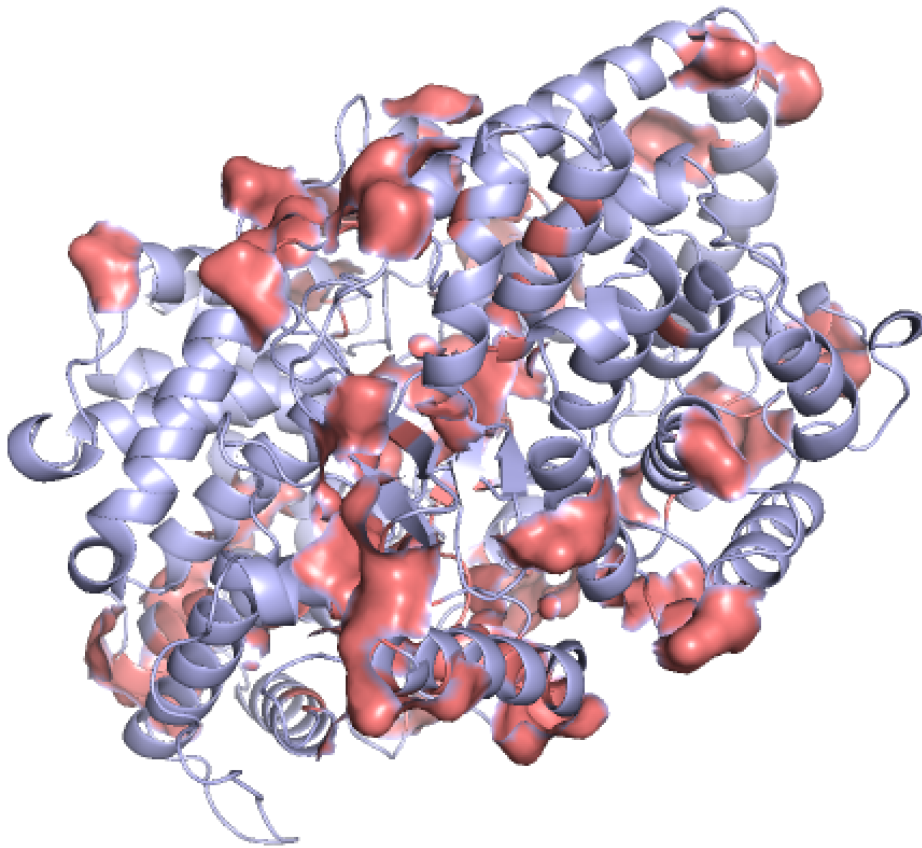

**Figure S30** (A) Sites under episodic positive selection detected by MEME. Y-axis showing how many branches may have been under selection under this site (very approximate and rough). (B) 3D structure of *P. ginseng* CAS (AF-O82139-F1). Sites that have experienced positive selection detected by MEME were highlighted in red.

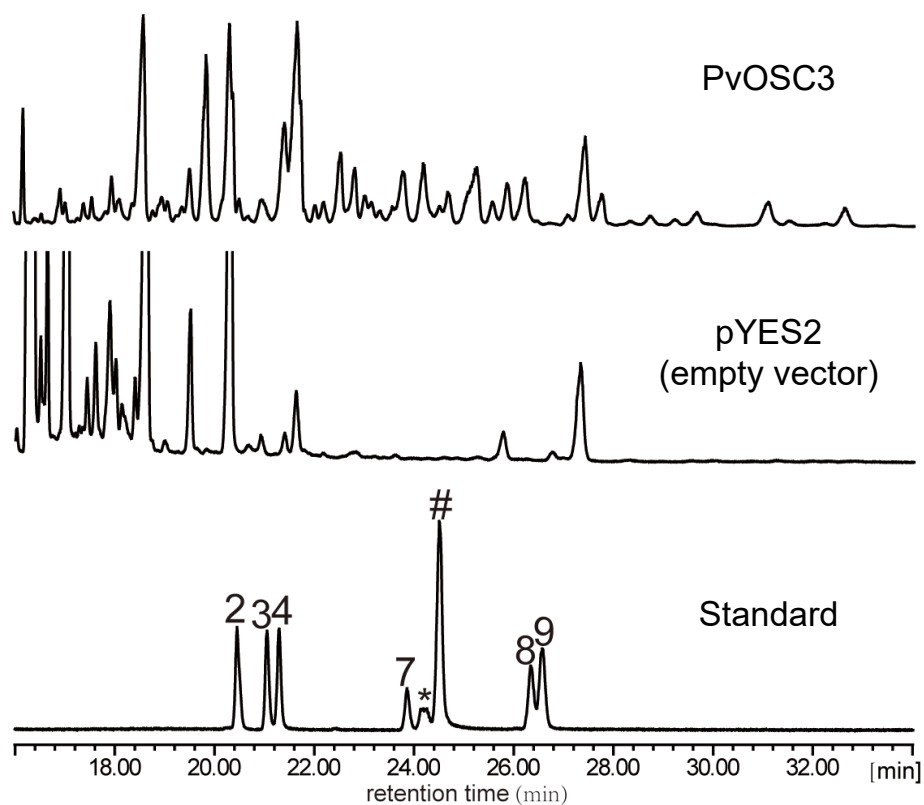

**Figure S31** Functional characterization of one *P. vietnamensis* var. *fuscidiscus* CAS using heterologous expression. \* and # in total ion chromatograms (TICs) represent epoxydammaranes mono-trimethylsilyl ether and dammarenediol-II mono-trimethylsilyl ether, respectively. 2:  $\beta$ -amyrin, 3:  $\alpha$ -amyrin, 4: cycloartenol, 7: dammarenediol II, 8: 20S,24S-3-epicabraleadiol, 9: 20S,24R-ocotillol.

**Table S1.** Statistics on *P. vietnamensis* var. *fuscidiscus* genome assembly.

| <b>Item</b>                                         | <b>Contig-level assembly</b> |               | <b>Hic chromosome-level assembly</b> |               |
|-----------------------------------------------------|------------------------------|---------------|--------------------------------------|---------------|
|                                                     | <b>length (bp)</b>           | <b>Number</b> | <b>length (bp)</b>                   | <b>Number</b> |
| <b>N90</b>                                          | 142,377                      | 4,074         | 85,413,289                           | 12            |
| <b>N80</b>                                          | 206,622                      | 3,082         | 107,381,201                          | 10            |
| <b>N70</b>                                          | 265,737                      | 2,344         | 110,022,002                          | 9             |
| <b>N60</b>                                          | 334,899                      | 1,770         | 120,995,942                          | 7             |
| <b>N50</b>                                          | 410,271                      | 1,304         | 144,079,729                          | 6             |
| <b>N40</b>                                          | 493,050                      | 919           | 149,510,626                          | 5             |
| <b>N30</b>                                          | 597,689                      | 600           | 153,102,694                          | 4             |
| <b>N20</b>                                          | 730,980                      | 339           | 159,980,755                          | 3             |
| <b>N10</b>                                          | 997,954                      | 134           | 160,487,695                          | 2             |
| <b>Max length</b>                                   | 2,342,647                    | -             | 164,156,069                          | -             |
| <b>Total length</b>                                 | 1,723,337,714                | -             | 1,727,411,714                        | -             |
| <b>Total number</b>                                 | -                            | 5,866         | -                                    | 6,305         |
| <b>Average length</b>                               | 293,787                      | -             | 273,974                              | -             |
| <b>Number of sequences <math>\geq 500</math>bp</b>  | -                            | 5,866         | -                                    | 6,305         |
| <b>Number of sequences <math>\geq 1000</math>bp</b> | -                            | 5,866         | -                                    | 6,304         |
| <b>Number of sequences <math>\geq 2000</math>bp</b> | -                            | 5,866         | -                                    | 5,676         |
| <b>Number of sequences <math>\geq 5000</math>bp</b> | -                            | 5,866         | -                                    | 4,664         |

**Table S2.** Genome size estimation of *P. vietnamensis* var. *fuscidiscus* using flow cytometry.

| <b>Sample ID</b> | <b><i>Solanum lycopersicum</i> fluorescence intensity</b> | <b><i>P. vietnamensis</i> var. <i>fuscidiscus</i> fluorescence intensity</b> | <b>Ratio</b> | <b><i>S. lycopersicum</i> genome size (Gb)</b> | <b><i>P. vietnamensis</i> var. <i>fuscidiscus</i> genome size (Gb)</b> | <b>Average Size (Gb)</b> | <b>Standard deviation</b> |
|------------------|-----------------------------------------------------------|------------------------------------------------------------------------------|--------------|------------------------------------------------|------------------------------------------------------------------------|--------------------------|---------------------------|
| <b>1</b>         | 108.72                                                    | 193.78                                                                       | 1.78         |                                                | 1.60                                                                   |                          |                           |
| <b>2</b>         | 109.86                                                    | 198.5                                                                        | 1.81         | 0.90                                           | 1.63                                                                   | 1.61                     | 0.01                      |
| <b>3</b>         | 110.09                                                    | 196.11                                                                       | 1.78         |                                                | 1.60                                                                   |                          |                           |

**Table S3.** Genome survey of *P. vietnamensis* var. *fuscidiscus* using Genomescope.

| <b>Property</b>              | <b>min</b>       | <b>max</b>       |
|------------------------------|------------------|------------------|
| <b>Homozygous (aa)</b>       | 99.14%           | 100%             |
| <b>Heterozygous (ab)</b>     | 0%               | 0.86%            |
| <b>Genome Haploid Length</b> | 1,188,704,553 bp | 1,430,039,526 bp |
| <b>Genome Repeat Length</b>  | 575,700,139 bp   | 692,580,802 bp   |
| <b>Genome Unique Length</b>  | 613,004,415 bp   | 737,458,723 bp   |
| <b>Model Fit</b>             | 53.47%           | 96.99%           |
| <b>Read Error Rate</b>       | 0.22%            | 0.22%            |

**Table S4.** Mapping statistics of Illumina reads to *P. vietnamensis* var. *fuscidiscus* assembly.

|                                                   | Total reads   | Supplementary reads | Mapped reads  | Reads paired in sequencing | Properly paired reads | Singletons (only one read mapped) | With mate mapped to a different sequence | Percentage of mapped reads | Percentage of properly paired reads | Genome coverage rate |
|---------------------------------------------------|---------------|---------------------|---------------|----------------------------|-----------------------|-----------------------------------|------------------------------------------|----------------------------|-------------------------------------|----------------------|
| <i>P. vietnamensis</i><br>var. <i>fuscidiscus</i> | 1,546,294,209 | 16,501,123          | 1,520,692,682 | 1,529,793,086              | 1,445,135,176         | 3,160,273                         | 50,057,132                               | 98.34%                     | 94.47%                              | 97.40%               |

**Table S5.** Comparison of gene space of *P. vietnamensis* var. *fuscidiscus* with other species.

| Species                                        | Gene number | Average mRNA length (bp) | Total exon number | Average exon length (bp) | Average cds length per gene (bp) | Average exon number | Total intron number | Average intron length (bp) | Average intron length per gene (bp) |
|------------------------------------------------|-------------|--------------------------|-------------------|--------------------------|----------------------------------|---------------------|---------------------|----------------------------|-------------------------------------|
| <i>E. senticosus</i>                           | 36,372      | 5575.58                  | 215,069           | 241.84                   | 1429.99                          | 5.91                | 180,779             | 834.08                     | 4145.60                             |
| <i>P. vietnamensis</i> var. <i>fuscidiscus</i> | 36,454      | 6166.47                  | 189,971           | 293.88                   | 1531.5                           | 5.21                | 158,204             | 976.21                     | 4236.58                             |
| <i>P. notoginseng</i>                          | 36,747      | 6298.53                  | 199,700           | 231.69                   | 1259.06                          | 5.43                | 169,123             | 979.01                     | 4506.02                             |
| <i>P. ginseng</i>                              | 59,352      | 4394.38                  | 297,411           | 223.53                   | 1120.12                          | 5.01                | 241,351             | 760.71                     | 3093.37                             |
| <i>C. asiatica</i>                             | 27,785      | 3624.05                  | 139,555           | 245.10                   | 1231.04                          | 5.02                | 111,770             | 594.88                     | 2393.00                             |

**Table S6.** Functional annotation of the predicted genes in *P. vietnamensis* var. *fuscidiscus*.

| Type                | Number | Percentage (%) |
|---------------------|--------|----------------|
| <b>Total</b>        | 36,454 | 100            |
| <b>eggNOG</b>       | 33,570 | 92.09          |
| <b>Annotated</b>    |        |                |
| <b>GO</b>           | 17,491 | 47.98          |
| <b>KEGG</b>         | 16,023 | 43.95          |
| <b>PFAM domains</b> | 31,444 | 86.26          |
| <b>Unannotated</b>  | 2,884  | 7.91           |

**Table S7.** BUSCO analysis results of genome assemblies and annotated gene sets for *P. vietnamensis* var.

*fuscidiscus* and *P. notoginseng*.

| Species                                        | Items                       | Complete BUSCOs | Complete and single-copy BUSCOs | Complete and duplicated BUSCOs | Fragmented BUSCOs | Missing BUSCOs | Total BUSCO groups searched |
|------------------------------------------------|-----------------------------|-----------------|---------------------------------|--------------------------------|-------------------|----------------|-----------------------------|
| <i>P. vietnamensis</i> var. <i>fuscidiscus</i> | Genome (full assembly)      | 95.3%           | 84.6%                           | 10.7%                          | 1.0%              | 3.7%           | 2,326                       |
|                                                | Genome (pseudo chromosomes) | 95.0%           | 84.9%                           | 10.1%                          | 1.0%              | 4.0%           | 2,326                       |
|                                                | Gene set                    | 92.6%           | 83.4%                           | 9.2%                           | 2.2%              | 5.2%           | 2,326                       |
| <i>P. notoginseng</i>                          | Genome (full assembly)      | 97.5%           | 84.2%                           | 13.3%                          | 1.0%              | 1.5%           | 2,326                       |
|                                                | Genome (pseudo chromosomes) | 96.8%           | 85.5%                           | 11.3%                          | 1.2%              | 2.0%           | 2,327                       |
|                                                | Gene set                    | 93.3%           | 81.7%                           | 11.6%                          | 1.9%              | 4.8%           | 2,326                       |



**Table S8.** Statistics on *P. notoginseng* genome assembly (updated).

| <b>Item</b>                            | <b>length (bp)</b> | <b>Number</b> |
|----------------------------------------|--------------------|---------------|
| <b>N90</b>                             | 152,644,078        | 12            |
| <b>N80</b>                             | 161,973,221        | 10            |
| <b>N70</b>                             | 169,268,257        | 9             |
| <b>N60</b>                             | 176,594,900        | 7             |
| <b>N50</b>                             | 196,656,904        | 6             |
| <b>N40</b>                             | 200,662,011        | 5             |
| <b>N30</b>                             | 213,721,665        | 4             |
| <b>N20</b>                             | 216,551,805        | 3             |
| <b>N10</b>                             | 221,362,758        | 2             |
| <b>Max length</b>                      | 225,175,661        | -             |
| <b>Total length</b>                    | 2,402,896,139      | -             |
| <b>Total number</b>                    | -                  | 5,223         |
| <b>Average length</b>                  | 460,060            | -             |
| <b>Number of sequences &gt;=500bp</b>  | -                  | 5,223         |
| <b>Number of sequences &gt;=1000bp</b> | -                  | 5,223         |
| <b>Number of sequences &gt;=2000bp</b> | -                  | 4,755         |
| <b>Number of sequences &gt;=5000bp</b> | -                  | 4,097         |

**Table S9.** Functional annotation of the predicted genes in *P. notoginseng*.

| Type                | Number | Percentage (%) |
|---------------------|--------|----------------|
| <b>Total</b>        | 36,747 | 100            |
| <b>eggNOG</b>       | 34,098 | 92.79          |
| <b>Annotated</b>    |        |                |
| <b>GO</b>           | 18,151 | 49.39          |
| <b>KEGG</b>         | 17,214 | 46.84          |
| <b>PFAM domains</b> | 30,993 | 84.34          |
| <b>Unannotated</b>  | 2,649  | 7.21           |

**Table S10.** Repeat annotation of *P. vietnamensis* var. *fuscidiscus*.

| Type                                | Length (bp)   | Percentage of genome (%) |
|-------------------------------------|---------------|--------------------------|
| <b>Tandem repeats</b>               |               |                          |
| <b>Simple repeats</b>               | 101,728,874   | 5.90                     |
| <b>Satellite repeats</b>            | 64,151        | 0.00                     |
| <b>Interspersed repeats</b>         |               |                          |
| <b>LTR</b>                          | 1,360,330,196 | 78.94                    |
| <b>LTR (Copia)</b>                  | 97,780,472    | 5.67                     |
| <b>LTR (Gypsy)</b>                  | 939,613,786   | 54.52                    |
| <b>SINE</b>                         | 39,882        | 0.00                     |
| <b>LINE</b>                         | 9,521,199     | 0.55                     |
| <b>DNA transposons</b>              | 50,052,051    | 2.90                     |
| <b>Unclassified</b>                 | 100,930,458   | 5.86                     |
| <b>Total (non-redundant)</b>        | 1,495,684,042 | 86.79                    |
| <b>LTR identity</b>                 |               | 95.26                    |
| <b>raw LTR assembly index (LAI)</b> |               | 15.18                    |
| <b>LAI</b>                          |               | 11.63                    |

**Table S11.** Repeat annotation of *P. notoginseng*.

| <b>Type</b>                         |                          | <b>Length (bp)</b> | <b>Percentage of genome (%)</b> |
|-------------------------------------|--------------------------|--------------------|---------------------------------|
| <b>Tandem repeats</b>               | <b>Simple repeats</b>    | 135,431,446        | 5.64                            |
|                                     | <b>Satellite repeats</b> | 1,939              | 0.00                            |
| <b>Interspersed repeats</b>         | <b>LTR</b>               | 1,938,176,020      | 80.66                           |
|                                     | <b>LTR (Copia)</b>       | 109,347,216        | 4.55                            |
|                                     | <b>LTR (Gypsy)</b>       | 1,333,339,204      | 55.49                           |
|                                     | <b>SINE</b>              | 8,342              | 0.00                            |
|                                     | <b>LINE</b>              | 9,181,808          | 0.38                            |
|                                     | <b>DNA transposons</b>   | 75,167,439         | 3.13                            |
|                                     | <b>Unclassified</b>      | 134,389,290        | 5.59                            |
| <b>Total (non-redundant)</b>        |                          | 2,118,941,998      | 88.18                           |
| <b>LTR identity</b>                 |                          |                    | 94.33                           |
| <b>raw LTR assembly index (LAI)</b> |                          |                    | 11.87                           |
| <b>LAI</b>                          |                          |                    | 10.95                           |

**Table S12.** Classification of transposable elements in *P. vietnamensis* var. *fuscidiscus*.

| <b>Class</b>                    | <b>Order</b> | <b>Superfamily</b> | <b>Clade</b>           | <b>Number</b> |               |                            |    |
|---------------------------------|--------------|--------------------|------------------------|---------------|---------------|----------------------------|----|
| <b>Class I retrotransposons</b> | <b>LTR</b>   | <b>Copia</b>       | <b>Ale</b>             | 3,358         |               |                            |    |
|                                 |              |                    | <b>Alesia</b>          | 111           |               |                            |    |
|                                 |              |                    | <b>Angela</b>          | 7,560         |               |                            |    |
|                                 |              |                    | <b>Bianca</b>          | 2,232         |               |                            |    |
|                                 |              |                    | <b>Bryco</b>           | 17            |               |                            |    |
|                                 |              |                    | <b>Lyco</b>            | 17            |               |                            |    |
|                                 |              |                    | <b>Gymco-III</b>       | 5             |               |                            |    |
|                                 |              |                    | <b>Gymco-I</b>         | 4             |               |                            |    |
|                                 |              |                    | <b>Gymco-II</b>        | 22            |               |                            |    |
|                                 |              |                    | <b>Ikeros</b>          | 1,537         |               |                            |    |
|                                 |              |                    | <b>Ivana</b>           | 950           |               |                            |    |
|                                 |              |                    | <b>Gymco-IV</b>        | 24            |               |                            |    |
|                                 |              |                    | <b>Osser</b>           | 16            |               |                            |    |
|                                 |              |                    | <b>SIRE</b>            | 12,000        |               |                            |    |
|                                 |              |                    | <b>TAR</b>             | 2,070         |               |                            |    |
|                                 |              |                    | <b>Tork</b>            | 1,487         |               |                            |    |
|                                 |              |                    | <b>mixture/unknown</b> | 98,537        |               |                            |    |
|                                 |              |                    |                        |               | <b>Gypsy</b>  | <b>non-chromo-outgroup</b> | 16 |
|                                 |              |                    |                        |               |               | <b>Phygy</b>               | 3  |
|                                 |              |                    |                        |               | <b>Selgy</b>  | 3                          |    |
|                                 |              |                    |                        |               | <b>Athila</b> | 12,422                     |    |
|                                 |              |                    |                        |               | <b>TatI</b>   | 8                          |    |
|                                 |              |                    | <b>TatII</b>           | 126           |               |                            |    |
|                                 |              |                    | <b>TatIII</b>          | 59            |               |                            |    |
|                                 |              |                    | <b>Ogre</b>            | 19,942        |               |                            |    |
|                                 |              |                    | <b>Retand</b>          | 7,292         |               |                            |    |
|                                 |              |                    | <b>Chlamyvir</b>       | 82            |               |                            |    |

---

|                     |                 |                       |                      |                        |         |
|---------------------|-----------------|-----------------------|----------------------|------------------------|---------|
|                     |                 |                       |                      | <b>Tcn1</b>            | 18      |
|                     |                 |                       |                      | <b>chromo-outgroup</b> | 64      |
|                     |                 |                       |                      | <b>CRM</b>             | 4,253   |
|                     |                 |                       |                      | <b>Galadriel</b>       | 167     |
|                     |                 |                       |                      | <b>Tekay</b>           | 233,307 |
|                     |                 |                       |                      | <b>Reina</b>           | 3,261   |
|                     |                 |                       |                      | <b>chromo-unclass</b>  | 8       |
|                     |                 |                       |                      | <b>mixture/unknown</b> | 639,713 |
|                     |                 | <b>Retrovirus</b>     | <b>unknown</b>       | <b>unknown</b>         | 2,145   |
|                     |                 | <b>pararetrovirus</b> | <b>unknown</b>       | <b>unknown</b>         | 3,263   |
|                     |                 | <b>DIRS</b>           | <b>unknown</b>       | <b>unknown</b>         | 316     |
|                     |                 | <b>LINE</b>           | <b>unknown</b>       | <b>unknown</b>         | 6,028   |
| <b>Class II DNA</b> | <b>Subclass</b> | <b>TIR</b>            | <b>EnSpm_CACTA</b>   | <b>unknown</b>         | 3,752   |
| <b>transposons</b>  | <b>1</b>        |                       | <b>hAT</b>           | <b>unknown</b>         | 3,322   |
|                     |                 |                       | <b>Merlin</b>        | <b>unknown</b>         | 1,762   |
|                     |                 |                       | <b>MuDR_Mutator</b>  | <b>unknown</b>         | 2,708   |
|                     |                 |                       | <b>PIF_Harbinger</b> | <b>unknown</b>         | 482     |
|                     |                 |                       | <b>Sola1</b>         | <b>unknown</b>         | 1       |
|                     |                 |                       | <b>Tc1_Mariner</b>   | <b>unknown</b>         | 280     |
|                     | <b>Subclass</b> | <b>Helitron</b>       | <b>unknown</b>       | <b>unknown</b>         | 667     |
|                     | <b>2</b>        | <b>Maverick</b>       | <b>unknown</b>       | <b>unknown</b>         | 4,085   |
| <b>mixture</b>      |                 | <b>mixture</b>        | <b>mixture</b>       | <b>unknown</b>         | 377     |

---

**Table S13.** Classification of transposable elements in *P. notoginseng*.

| <b>Class</b>                    | <b>Order</b>     | <b>Superfamily</b> | <b>Clade</b>           | <b>Number</b>              |    |
|---------------------------------|------------------|--------------------|------------------------|----------------------------|----|
| <b>Class I retrotransposons</b> | <b>LTR</b>       | <b>Copia</b>       | <b>Ale</b>             | 4,060                      |    |
|                                 |                  |                    | <b>Alesia</b>          | 155                        |    |
|                                 |                  |                    | <b>Angela</b>          | 15,715                     |    |
|                                 |                  |                    | <b>Bianca</b>          | 2,933                      |    |
|                                 |                  |                    | <b>Bryco</b>           | 13                         |    |
|                                 |                  |                    | <b>Lyco</b>            | 13                         |    |
|                                 |                  |                    | <b>Gymco-III</b>       | 6                          |    |
|                                 |                  |                    | <b>Gymco-I</b>         | 15                         |    |
|                                 |                  |                    | <b>Gymco-II</b>        | 22                         |    |
|                                 |                  |                    | <b>Ikeros</b>          | 1,820                      |    |
|                                 |                  |                    | <b>Ivana</b>           | 1,389                      |    |
|                                 |                  |                    | <b>Gymco-IV</b>        | 16                         |    |
|                                 |                  |                    | <b>Osser</b>           | 14                         |    |
|                                 |                  |                    | <b>SIRE</b>            | 10,494                     |    |
|                                 |                  |                    | <b>TAR</b>             | 2,481                      |    |
|                                 |                  |                    | <b>Tork</b>            | 1,708                      |    |
|                                 |                  |                    | <b>mixture/unknown</b> | 114,324                    |    |
|                                 |                  |                    | <b>Gypsy</b>           | <b>non-chromo-outgroup</b> | 29 |
|                                 |                  |                    |                        | <b>Phygy</b>               | 4  |
|                                 |                  |                    | <b>Selgy</b>           | 3                          |    |
|                                 |                  |                    | <b>Athila</b>          | 18,508                     |    |
|                                 |                  |                    | <b>TatI</b>            | 7                          |    |
|                                 |                  |                    | <b>TatII</b>           | 236                        |    |
|                                 | <b>TatIII</b>    | 75                 |                        |                            |    |
|                                 | <b>Ogre</b>      | 34,678             |                        |                            |    |
|                                 | <b>Retand</b>    | 15,239             |                        |                            |    |
|                                 | <b>Chlamyvir</b> | 99                 |                        |                            |    |

---

|                     |                 |                       |                      |                        |         |
|---------------------|-----------------|-----------------------|----------------------|------------------------|---------|
|                     |                 |                       |                      | <b>Tcn1</b>            | 16      |
|                     |                 |                       |                      | <b>chromo-outgroup</b> | 57      |
|                     |                 |                       |                      | <b>CRM</b>             | 4,791   |
|                     |                 |                       |                      | <b>Galadriel</b>       | 232     |
|                     |                 |                       |                      | <b>Tekay</b>           | 332,594 |
|                     |                 |                       |                      | <b>Reina</b>           | 4,502   |
|                     |                 |                       |                      | <b>chromo-unclass</b>  | 22      |
|                     |                 |                       |                      | <b>mixture/unknown</b> | 999,717 |
|                     |                 | <b>Retrovirus</b>     | <b>unknown</b>       | <b>unknown</b>         | 584     |
|                     |                 | <b>pararetrovirus</b> | <b>unknown</b>       | <b>unknown</b>         | 4,309   |
|                     |                 | <b>DIRS</b>           | <b>unknown</b>       | <b>unknown</b>         | 1,226   |
|                     |                 | <b>LINE</b>           | <b>unknown</b>       | <b>unknown</b>         | 3,373   |
| <b>Class II DNA</b> | <b>Subclass</b> | <b>TIR</b>            | <b>EnSpm_CACTA</b>   | <b>unknown</b>         | 5,060   |
| <b>transposons</b>  | <b>1</b>        |                       | <b>hAT</b>           | <b>unknown</b>         | 3,539   |
|                     |                 |                       | <b>Merlin</b>        | <b>unknown</b>         | 1,693   |
|                     |                 |                       | <b>MuDR_Mutator</b>  | <b>unknown</b>         | 5,574   |
|                     |                 |                       | <b>PIF_Harbinger</b> | <b>unknown</b>         | 1,059   |
|                     |                 |                       | <b>Sola1</b>         | <b>unknown</b>         | 18      |
|                     |                 |                       | <b>Tc1_Mariner</b>   | <b>unknown</b>         | 1,090   |
|                     | <b>Subclass</b> | <b>Helitron</b>       | <b>unknown</b>       | <b>unknown</b>         | 1,769   |
|                     | <b>2</b>        | <b>Maverick</b>       | <b>unknown</b>       | <b>unknown</b>         | 3,616   |
| <b>mixture</b>      |                 | <b>mixture</b>        | <b>mixture</b>       | <b>unknown</b>         | 560     |

---

**Table S14.** Summary of gene family analysis of *P. vietnamensis* var. *fuscidiscus* with other species.

| Type                                                | Number  |
|-----------------------------------------------------|---------|
| Number of species                                   | 12      |
| Number of genes                                     | 416,694 |
| Number of genes in orthogroups                      | 387,841 |
| Number of unassigned genes                          | 28,853  |
| Percentage of genes in orthogroups                  | 93.1    |
| Percentage of unassigned genes                      | 6.9     |
| Number of orthogroups                               | 30,074  |
| Number of species-specific orthogroups              | 7,487   |
| Number of genes in species-specific orthogroups     | 36,109  |
| Percentage of genes in species-specific orthogroups | 8.7     |
| Mean orthogroup size                                | 12.9    |
| Median orthogroup size                              | 10      |
| G50 (assigned genes)                                | 20      |
| G50 (all genes)                                     | 19      |
| O50 (assigned genes)                                | 5,736   |
| O50 (all genes)                                     | 6,486   |
| Number of orthogroups with all species present      | 8,542   |
| Number of single-copy orthogroups                   | 168     |



**Table S15.** Results of GO enrichment analysis of expanded gene families in *P. vietnamensis* var. *fuscidiscus* ( $P < 0.05$ ).

| ID         | Description                                          | GeneRatio | BgRatio   | p.adjust    | qvalue      | Count |
|------------|------------------------------------------------------|-----------|-----------|-------------|-------------|-------|
| GO:0030246 | carbohydrate binding                                 | 40/253    | 406/17485 | 3.37325E-20 | 2.24067E-20 | 40    |
| GO:0004553 | hydrolase activity, hydrolyzing O-glycosyl compounds | 38/253    | 410/17485 | 3.15485E-18 | 2.0956E-18  | 38    |
| GO:0016798 | hydrolase activity, acting on glycosyl bonds         | 38/253    | 446/17485 | 4.66915E-17 | 3.10146E-17 | 38    |
| GO:0004565 | beta-galactosidase activity                          | 32/253    | 106/17485 | 4.15053E-31 | 2.75698E-31 | 32    |
| GO:0015925 | galactosidase activity                               | 32/253    | 114/17485 | 3.86914E-30 | 2.57007E-30 | 32    |
| GO:0120251 | hydrocarbon biosynthetic process                     | 27/253    | 68/17485  | 4.60183E-30 | 3.05675E-30 | 27    |
| GO:0120252 | hydrocarbon metabolic process                        | 27/253    | 77/17485  | 1.17591E-28 | 7.81096E-29 | 27    |
| GO:0000287 | magnesium ion binding                                | 24/253    | 224/17485 | 9.14711E-13 | 6.07594E-13 | 24    |
| GO:0010333 | terpene synthase activity                            | 22/253    | 32/17485  | 4.15053E-31 | 2.75698E-31 | 22    |
| GO:0016838 | carbon-oxygen lyase activity, acting on phosphates   | 22/253    | 37/17485  | 1.80523E-29 | 1.19912E-29 | 22    |
| GO:0016835 | carbon-oxygen lyase activity                         | 22/253    | 167/17485 | 1.69374E-13 | 1.12506E-13 | 22    |
| GO:0010334 | sesquiterpene synthase activity                      | 19/253    | 24/17485  | 2.4489E-29  | 1.62668E-29 | 19    |
| GO:0051761 | sesquiterpene metabolic process                      | 19/253    | 24/17485  | 2.4489E-29  | 1.62668E-29 | 19    |
| GO:0051762 | sesquiterpene biosynthetic process                   | 19/253    | 24/17485  | 2.4489E-29  | 1.62668E-29 | 19    |
| GO:0034247 | snoRNA splicing                                      | 10/253    | 10/17485  | 1.95372E-17 | 1.29776E-17 | 10    |

---

|            |                                                                                                       |        |          |             |             |    |
|------------|-------------------------------------------------------------------------------------------------------|--------|----------|-------------|-------------|----|
| GO:0080013 | (E,E)-geranylinalool synthase activity                                                                | 10/253 | 10/17485 | 1.95372E-17 | 1.29776E-17 | 10 |
| GO:0010623 | programmed cell death involved in cell development                                                    | 10/253 | 22/17485 | 7.74677E-12 | 5.14577E-12 | 10 |
| GO:0045292 | mRNA cis splicing, via spliceosome                                                                    | 10/253 | 23/17485 | 1.23559E-11 | 8.20739E-12 | 10 |
| GO:0080027 | response to herbivore                                                                                 | 9/253  | 16/17485 | 9.99025E-12 | 6.63599E-12 | 9  |
| GO:0016635 | oxidoreductase activity, acting on the CH-CH group of donors, quinone or related compound as acceptor | 8/253  | 13/17485 | 7.23975E-11 | 4.80898E-11 | 8  |

---

**Table S16.** Results of KEGG enrichment analysis of expanded gene families in *P. vietnamensis* var. *fuscidiscus* ( $P < 0.05$ ).

| Term Name                                           | MainClass                                   | GeneRatio | BgRatio    | enrichFactor | corrected p-value(BH method) |
|-----------------------------------------------------|---------------------------------------------|-----------|------------|--------------|------------------------------|
| B 09131 Membrane transport                          | A09130 Environmental Information Processing | 17/331    | 90/15326   | 8.745955     | 1.993E-10                    |
| 02010 ABC transporters                              | A09130 Environmental Information Processing | 17/331    | 90/15326   | 8.745955     | 1.993E-10                    |
| 04090 CD molecules                                  | A09180 Brite Hierarchies                    | 10/331    | 65/15326   | 7.1234023    | 1.427E-05                    |
| 00909 Sesquiterpenoid and triterpenoid biosynthesis | A09100 Metabolism                           | 25/331    | 201/15326  | 5.7589695    | 6.421E-11                    |
| 00904 Diterpenoid biosynthesis                      | A09100 Metabolism                           | 5/331     | 42/15326   | 5.5121565    | 0.015191                     |
| 03032 DNA replication proteins                      | A09180 Brite Hierarchies                    | 20/331    | 240/15326  | 3.8585096    | 3.761E-06                    |
| 00240 Pyrimidine metabolism                         | A09100 Metabolism                           | 8/331     | 101/15326  | 3.6674942    | 0.0127851                    |
| 04120 Ubiquitin mediated proteolysis                | A09120 Genetic Information Processing       | 15/331    | 213/15326  | 3.2607123    | 0.0006457                    |
| B 09109 Metabolism of terpenoids and polyketides    | A09100 Metabolism                           | 31/331    | 498/15326  | 2.8822602    | 2.124E-06                    |
| 03036 Chromosome and associated proteins            | A09180 Brite Hierarchies                    | 64/331    | 1131/15326 | 2.620102     | 5.7E-11                      |
| A09130 Environmental Information Processing         | A09130 Environmental Information Processing | 30/331    | 652/15326  | 2.1304654    | 0.0007545                    |

**Table S17.** Summary of Gaussian kernel analysis on Ks distribution of intraspecific and interspecific colinear gene blocks.

| Intraspecific/interspecific colinear gene blocks                                 | Peak of Ks distribution | Deviation | R square of linear regression |
|----------------------------------------------------------------------------------|-------------------------|-----------|-------------------------------|
| <i>A. graveolens</i> (gamma)                                                     | 1.793                   | 0.1824    | 0.8052                        |
| <i>A. graveolens</i> (Apiaceae-β)                                                | 1.0479                  | 0.1343    | 0.9315                        |
| <i>A. graveolens</i> (Apiaceae-α)                                                | 0.5749                  | 0.086     | 0.9434                        |
| <i>C. asiatica</i> (gamma)                                                       | 1.7442                  | 0.2825    | 0.9207                        |
| <i>C. asiatica</i> (Casi-α)                                                      | 0.7481                  | 0.1003    | 0.9513                        |
| <i>E. senticosus</i> (gamma)                                                     | 1.4778                  | 0.1737    | 0.9262                        |
| <i>E. senticosus</i> (Pg-β)                                                      | 0.3818                  | 0.0338    | 0.9718                        |
| <i>E. senticosus</i> (Esen-α)                                                    | 0.137                   | 0.021     | 0.9968                        |
| <i>P. notoginseng</i> (gamma)                                                    | 1.5018                  | 0.2433    | 0.9272                        |
| <i>P. notoginseng</i> (Pg-β)                                                     | 0.3837                  | 0.0362    | 0.9312                        |
| <i>P. vietnamensis</i> var. <i>fuscidiscus</i> (gamma)                           | 1.5116                  | 0.2141    | 0.9418                        |
| <i>P. vietnamensis</i> var. <i>fuscidiscus</i> (Pg-β)                            | 0.3773                  | 0.0502    | 0.9604                        |
| <i>V. vinifera</i> (gamma)                                                       | 1.2852                  | 0.155     | 0.9624                        |
| <i>A. graveolens</i> - <i>V. vinifera</i> (gamma)                                | 1.6519                  | 0.4224    | 0.9612                        |
| <i>A. graveolens</i> - <i>V. vinifera</i> (speciation)                           | 1.3022                  | 0.1878    | 0.9686                        |
| <i>C. asiatica</i> - <i>V. vinifera</i> (gamma)                                  | 1.5838                  | 0.2906    | 0.9431                        |
| <i>C. asiatica</i> - <i>V. vinifera</i> (speciation)                             | 1.1554                  | 0.1357    | 0.9766                        |
| <i>E. senticosus</i> - <i>V. vinifera</i> (gamma)                                | 1.4135                  | 0.2386    | 0.9719                        |
| <i>E. senticosus</i> - <i>V. vinifera</i> (speciation)                           | 0.9966                  | 0.1098    | 0.983                         |
| <i>P. notoginseng</i> - <i>V. vinifera</i> (gamma)                               | 1.3906                  | 0.2103    | 0.9516                        |
| <i>P. notoginseng</i> - <i>V. vinifera</i> (speciation)                          | 1.0036                  | 0.0868    | 0.9433                        |
| <i>P. vietnamensis</i> var. <i>fuscidiscus</i> - <i>V. vinifera</i> (gamma)      | 1.4178                  | 0.1673    | 0.9193                        |
| <i>P. vietnamensis</i> var. <i>fuscidiscus</i> - <i>V. vinifera</i> (speciation) | 1.0055                  | 0.1114    | 0.9448                        |
| <i>A. graveolens</i> - <i>C. asiatica</i> (gamma)                                | 1.8155                  | 0.2772    | 0.9523                        |

|                                                                                     |        |        |        |
|-------------------------------------------------------------------------------------|--------|--------|--------|
| <i>A. graveolens</i> - <i>C. asiatica</i> (speciation)                              | 0.8394 | 0.1392 | 0.9548 |
| <i>P. vietnamensis</i> var. <i>fuscidiscus</i> - <i>A. graveolens</i> (gamma)       | 1.7051 | 0.2832 | 0.9618 |
| <i>P. vietnamensis</i> var. <i>fuscidicu</i> - <i>A. graveolens</i> (speciation)    | 0.7184 | 0.0922 | 0.9781 |
| <i>P. vietnamensis</i> var. <i>fuscidiscus</i> - <i>C. asiatica</i> (gamma)         | 1.6343 | 0.248  | 0.9469 |
| <i>P. vietnamensis</i> var. <i>fuscidiscus</i> - <i>C. asiatica</i> (speciation)    | 0.5348 | 0.0734 | 0.9618 |
| <i>P. vietnamensis</i> var. <i>fuscidiscus</i> - <i>E. senticosus</i> (gamma)       | 1.4891 | 0.1774 | 0.9418 |
| <i>P. vietnamensis</i> var. <i>fuscidicu</i> - <i>E. senticosus</i> (Pg-β)          | 0.3746 | 0.0351 | 0.9637 |
| <i>P. vietnamensis</i> var. <i>fuscidiscus</i> - <i>E. senticosus</i> (speciation)  | 0.1476 | 0.0222 | 0.9772 |
| <i>P. vietnamensis</i> var. <i>fuscidiscus</i> - <i>P. notoginseng</i> (gamma)      | 1.4978 | 0.2106 | 0.9145 |
| <i>P. vietnamensis</i> var. <i>fuscidiscus</i> - <i>P. notoginseng</i> (Pg-β)       | 0.3801 | 0.0404 | 0.9577 |
| <i>P. vietnamensis</i> var. <i>fuscidiscus</i> - <i>P. notoginseng</i> (speciation) | 0.0311 | 0.0094 | 0.9839 |

**Table S18.** Summary of Collinear genomics subsets for five species.

| Species                           | <i>V. vinifera</i> | <i>C. asiatica</i>             | <i>E. senticosus</i> | <i>P. notoginseng</i> | <i>P. vietnamensis</i> var. <i>fuscidiscus</i> |
|-----------------------------------|--------------------|--------------------------------|----------------------|-----------------------|------------------------------------------------|
| <b>Whole genome duplications</b>  | γ                  | γ triplication                 | γ                    | γ triplication        | γ triplication                                 |
| <b>Number of collinear copies</b> | 3                  | 6                              | 12                   | 6                     | 6                                              |
|                                   | -                  | Casi-α/Apiaceae-<br>common WGD | Pg-β                 | Pg-β                  | Pg-β                                           |
|                                   | -                  | -                              | Esen-α               | -                     | -                                              |

**Table S19.** General statistics on oxidosqualene cyclase genes from eight species identified using HMMER.

| Species              | Sequence id               | Name    | CDS<br>length<br>(bp)                               | Function/Putative function                          |
|----------------------|---------------------------|---------|-----------------------------------------------------|-----------------------------------------------------|
| <i>A. trichopoda</i> | ERN12565                  | AtOSC1  | 2,286                                               | Cycloartenol synthase                               |
| <i>A. fimbriata</i>  | KAG9449364.1              | AfOSC1  | 2,283                                               | Cycloartenol synthase                               |
|                      | KAG9449355.1              | AfOSC2  | 2,265                                               | Lanosterol synthase                                 |
| <i>V. vinifera</i>   | GSVIVT01029468001         | VvOSC1  | 1,683                                               | Cycloartenol synthase                               |
|                      | GSVIVT01029527001         | VvOSC2  | 2,274                                               | Cycloartenol synthase                               |
|                      | GSVIVT01029514001         | VvOSC3  | 2,274                                               | Cycloartenol synthase                               |
|                      | GSVIVT01029525001         | VvOSC4  | 2,409                                               | Cycloartenol synthase                               |
|                      | GSVIVT01029524001         | VvOSC5  | 2,409                                               | Cycloartenol synthase                               |
|                      | GSVIVT01015994001         | VvOSC6  | 1,683                                               | Cycloartenol synthase                               |
|                      | GSVIVT01032285001         | VvOSC7  | 2,283                                               | Cycloartenol synthase                               |
|                      | GSVIVT01032217001         | VvOSC8  | 2,406                                               | Lupeol synthase                                     |
|                      | GSVIVT01021473001         | VvOSC9  | 2,262                                               | $\beta$ -amyrin synthase and other mTTSs (Group I)  |
|                      | GSVIVT01021474001         | VvOSC10 | 2,280                                               | $\beta$ -amyrin synthase and other mTTSs (Group I)  |
|                      | GSVIVT01021494001         | VvOSC11 | 2,280                                               | $\beta$ -amyrin synthase and other mTTSs (Group I)  |
|                      | GSVIVT01021495001         |         | 24,72                                               | $\beta$ -amyrin synthase and other mTTSs (Group I)  |
|                      |                           |         | 6                                                   |                                                     |
|                      | GSVIVT01029510001         | VvOSC12 | 2,445                                               | $\beta$ -amyrin synthase and other mTTSs (Group II) |
|                      | GSVIVT01029509001         | VvOSC13 | 2,541                                               | $\beta$ -amyrin synthase and other mTTSs (Group II) |
|                      | GSVIVT01029491001         | VvOSC14 | 1,539                                               | $\beta$ -amyrin synthase and other mTTSs (Group II) |
|                      | GSVIVT01029488001         | VvOSC15 | 2,310                                               | $\beta$ -amyrin synthase and other mTTSs (Group II) |
|                      | GSVIVT01029489001         | VvOSC16 | 2,619                                               | $\beta$ -amyrin synthase and other mTTSs (Group II) |
| GSVIVT01029508001    | VvOSC17                   | 2,733   | $\beta$ -amyrin synthase and other mTTSs (Group II) |                                                     |
| GSVIVT01029474001    | VvOSC18                   | 2,658   | $\beta$ -amyrin synthase and other mTTSs (Group II) |                                                     |
| <i>C. asiatica</i>   | evm.model.Scaffold_7.3187 | CaOSC1  | 2,274                                               | Cycloartenol synthase                               |
|                      | evm.model.Scaffold_3.13   | CaOSC2  | 2,391                                               | Lanosterol synthase                                 |

---

|                               |                           |         |       |                                                     |
|-------------------------------|---------------------------|---------|-------|-----------------------------------------------------|
|                               | evm.model.Scaffold_1.5050 | CaOSC3  | 4,389 | Lupeol synthase                                     |
|                               | evm.model.Scaffold_1.163  | CaOSC4  | 2,283 | $\beta$ -amyrin synthase and other mTTSs (Group I)  |
|                               | evm.model.Scaffold_1.3735 | CaOSC5  | 2,283 | $\beta$ -amyrin synthase and other mTTSs (Group I)  |
|                               | evm.model.Scaffold_1.3299 | CaOSC6  | 2,298 | $\beta$ -amyrin synthase and other mTTSs (Group I)  |
|                               | evm.model.Scaffold_7.2291 | CaOSC7  | 2,286 | $\beta$ -amyrin synthase and other mTTSs (Group II) |
|                               | evm.model.Scaffold_5.2605 | CaOSC8  | 2,298 | $\beta$ -amyrin synthase and other mTTSs (Group II) |
|                               | evm.model.Scaffold_5.2606 | CaOSC9  | 2,295 | $\beta$ -amyrin synthase and other mTTSs (Group II) |
|                               | evm.model.Scaffold_7.2982 | CaOSC10 | 2,178 | $\beta$ -amyrin synthase and other mTTSs (Group II) |
| <b><i>E. senticosus</i></b>   | Ese03G002792.t1           | EsOSC1  | 2,277 | Cycloartenol synthase                               |
|                               | Ese12G002640.t1           | EsOSC2  | 2,274 | Cycloartenol synthase                               |
|                               | Ese18G000732.t1           | EsOSC3  | 2,487 | Lupeol synthase                                     |
|                               | Ese07G000079.t1           | EsOSC4  | 2,286 | $\beta$ -amyrin synthase and other mTTSs (Group II) |
|                               | Ese17G001441.t1           | EsOSC5  | 2,160 | $\beta$ -amyrin synthase and other mTTSs (Group II) |
|                               | Ese24G002150.t1           | EsOSC6  | 2,253 | $\beta$ -amyrin synthase and other mTTSs (Group II) |
|                               | Ese11G000382.t1           | EsOSC7  | 2,295 | $\beta$ -amyrin synthase and other mTTSs (Group II) |
|                               | Ese11G000379.t1           | EsOSC8  | 1,752 | $\beta$ -amyrin synthase and other mTTSs (Group II) |
| <b><i>P. notoginseng</i></b>  | Pno05G000040.t1           | PnOSC1  | 2,274 | Cycloartenol synthase                               |
|                               | Pno01G006888.t1           | PnOSC2  | 2,277 | Cycloartenol synthase                               |
|                               | Pno05G000039.t1           | PnOSC3  | 2,331 | Lanosterol synthase                                 |
|                               | Pno05G003783.t1           | PnOSC4  | 2,178 | Lupeol synthase                                     |
|                               | Pno10G001026.t1           | PnOSC5  | 2,280 | $\beta$ -amyrin synthase and other mTTSs (Group I)  |
|                               | Pno03G005730.t1           | PnOSC6  | 2,310 | Dammarenediol synthase                              |
|                               | Pno03G005732.t1           | PnOSC7  | 2,310 | Dammarenediol synthase                              |
|                               | Pno02G006287.t1           | PnOSC8  | 2,286 | $\beta$ -amyrin synthase and other mTTSs (Group II) |
|                               | Pno04G000589.t1           | PnOSC9  | 2,274 | $\beta$ -amyrin synthase and other mTTSs (Group II) |
|                               | Pno09G004398.t1           | PnOSC10 | 2,316 | $\beta$ -amyrin synthase and other mTTSs (Group II) |
|                               | Pno12G004330.t1           | PnOSC11 | 2,292 | $\beta$ -amyrin synthase and other mTTSs (Group II) |
|                               | Pno02G002482.t1           | PnOSC12 | 1,977 | $\beta$ -amyrin synthase and other mTTSs (Group II) |
| <b><i>P. vietnamensis</i></b> | Pvi05G002838.t1           | PvOSC1  | 2,274 | Cycloartenol synthase                               |

---

---

|                   |                 |         |       |                                                     |
|-------------------|-----------------|---------|-------|-----------------------------------------------------|
|                   | Pvi79G000004.t1 | PvOSC2  | 1,977 | Cycloartenol synthase                               |
|                   | Pvi04G017143.t1 | PvOSC3  | 2,277 | Cycloartenol synthase                               |
|                   | Pvi05G002839.t1 | PvOSC4  | 2,334 | Lanosterol synthase                                 |
|                   | Pvi05G007905.t1 | PvOSC5  | 2,187 | Lupeol synthase                                     |
|                   | Pvi08G000242.t1 | PvOSC6  | 2,280 | $\beta$ -amyrin synthase and other mTTSs (Group I)  |
|                   | Pvi06G002447.t1 | PvOSC7  | 2,310 | Dammarenediol synthase                              |
|                   | Pvi02G002534.t1 | PvOSC8  | 2,286 | $\beta$ -amyrin synthase and other mTTSs (Group II) |
|                   | Pvi07G000589.t1 | PvOSC9  | 2,289 | $\beta$ -amyrin synthase and other mTTSs (Group II) |
|                   | Pvi12G004397.t1 | PvOSC10 | 2,361 | $\beta$ -amyrin synthase and other mTTSs (Group II) |
|                   | Pvi01G001914.t1 | PvOSC11 | 2,337 | $\beta$ -amyrin synthase and other mTTSs (Group II) |
| <i>P. ginseng</i> | Pg_S0266.37     | PgOSC1  | 2,277 | Cycloartenol synthase                               |
|                   | Pg_S0762.36     | PgOSC2  | 2,277 | Cycloartenol synthase                               |
|                   | Pg_S0910.3      | PgOSC3  | 2,490 | Cycloartenol synthase                               |
|                   | Pg_S2798.13     | PgOSC4  | 2,277 | Cycloartenol synthase                               |
|                   | Pg_S0701.10     | PgOSC5  | 2,205 | Cycloartenol synthase                               |
|                   | Pg_S0266.35     | PgOSC6  | 2,214 | Lanosterol synthase                                 |
|                   | Pg_S0762.35     | PgOSC7  | 2,331 | Lanosterol synthase                                 |
|                   | Pg_S0577.13     | PgOSC8  | 2,280 | Lupeol synthase                                     |
|                   | Pg_S4166.7      | PgOSC9  | 2,289 | $\beta$ -amyrin synthase and other mTTSs (Group I)  |
|                   | Pg_S3517.9      | PgOSC10 | 1,524 | Dammarenediol synthase                              |
|                   | Pg_S3318.3      | PgOSC11 | 2,310 | Dammarenediol synthase                              |
|                   | Pg_S4815.4      | PgOSC12 | 2,286 | $\beta$ -amyrin synthase and other mTTSs (Group II) |
|                   | Pg_S0034.9      | PgOSC13 | 2,286 | $\beta$ -amyrin synthase and other mTTSs (Group II) |
|                   | Pg_S0034.2      | PgOSC14 | 2,295 | $\beta$ -amyrin synthase and other mTTSs (Group II) |
|                   | Pg_S2801.2      | PgOSC15 | 2,286 | $\beta$ -amyrin synthase and other mTTSs (Group II) |
|                   | Pg_S2939.4      | PgOSC16 | 2,289 | $\beta$ -amyrin synthase and other mTTSs (Group II) |
|                   | Pg_S0361.30     | PgOSC17 | 2,043 | $\beta$ -amyrin synthase and other mTTSs (Group II) |
|                   | Pg_S2492.7      | PgOSC18 | 2,292 | $\beta$ -amyrin synthase and other mTTSs (Group II) |
|                   | Pg_S0888.6      | PgOSC19 | 2,292 | $\beta$ -amyrin synthase and other mTTSs (Group II) |

---



|                              |                   |        |       |                          |
|------------------------------|-------------------|--------|-------|--------------------------|
|                              | AB009029          | PgPNX1 | 2,259 | Cycloartenol synthase    |
|                              | AB009030          | PgPNY1 | 2,589 | $\beta$ -amyrin synthase |
|                              | AB009031          | PgPNZ1 | 2,684 | Lanosterol synthase      |
| <i>Welwitschia mirabilis</i> | W.mirabilis.02578 | WmOSC1 | 2,280 | Cycloartenol synthase    |
| <i>s</i>                     |                   |        |       |                          |
| <i>Artemisia annua</i>       | KM670094          | AaLUS  | 2,274 | Lupeol synthase          |
| <i>Panax quinquefolius</i>   | GU997679          | PqDDS  | 2,310 | Dammarenediol synthase   |

**Table S20.** Product profile for OSCs based on GC analysis.  $\checkmark$  and  $\times$  represents presence and absence of compounds.

| <b>Protein ID</b> | <b>1</b>     | <b>2</b>     | <b>3</b>     | <b>5</b>     | <b>6</b>     | <b>7</b>     | <b>8</b>     | <b>9</b>     | <b>*</b>     | <b>#</b>     | <b>Unidentified</b> |
|-------------------|--------------|--------------|--------------|--------------|--------------|--------------|--------------|--------------|--------------|--------------|---------------------|
| <b>PvOSC6</b>     | $\checkmark$        |
| <b>PgOSC9</b>     | $\checkmark$        |
| <b>PnOSC5</b>     | $\checkmark$        |
| <b>CaOSC6</b>     | $\checkmark$        |
| <b>CaOSC5</b>     | $\checkmark$        |
| <b>PgOSC11</b>    | $\times$     | $\times$     | $\times$     | $\times$     | $\times$     | $\checkmark$ | $\checkmark$ | $\checkmark$ | $\checkmark$ | $\checkmark$ | $\times$            |
| <b>PqDDS</b>      | $\times$     | $\times$     | $\times$     | $\times$     | $\times$     | $\checkmark$ | $\checkmark$ | $\checkmark$ | $\checkmark$ | $\checkmark$ | $\times$            |
| <b>PvOSC7</b>     | $\times$     | $\times$     | $\times$     | $\times$     | $\times$     | $\checkmark$ | $\checkmark$ | $\checkmark$ | $\checkmark$ | $\checkmark$ | $\times$            |
| <b>PnOSC6</b>     | $\times$     | $\times$     | $\times$     | $\times$     | $\times$     | $\checkmark$ | $\checkmark$ | $\checkmark$ | $\checkmark$ | $\checkmark$ | $\times$            |

**Table S21.** <sup>13</sup>C and <sup>1</sup>H NMR assignments for compound 8 and 9.

| No.                   | Compound 8 (3-epicabraleadiol)      |            | Compound 9 (ocotillol)              |            |
|-----------------------|-------------------------------------|------------|-------------------------------------|------------|
|                       | $\delta$ H (J in Hz)                | $\delta$ C | $\delta$ H (J in Hz)                | $\delta$ C |
| C1(CH <sub>2</sub> )  | 1.69(1H, m), 0.97(1H, m)            | 39.04      | 1.67(1H, m), 0.95(1H, m)            | 39.03      |
| C2(CH <sub>2</sub> )  | 1.65(1H, m), 1.57(1H, m)            | 27.41      | 1.64(1H, m), 1.57(1H, m)            | 27.39      |
| C3(CH)                | 3.20 (1H, dd, <i>J</i> = 11.5, 4.7) | 78.95      | 3.19 (1H, dd, <i>J</i> = 11.5, 4.8) | 78.93      |
| C4(qC)                |                                     | 38.96      |                                     | 38.95      |
| C5(CH)                | 0.73 (1H, dd, <i>J</i> = 11.9, 2.2) | 55.84      | 0.72 (dd, <i>J</i> = 12.0, 2.0)     | 55.83      |
| C6(CH <sub>2</sub> )  | 1.52 (1H, m), 1.42(1H, m)           | 18.27      | 1.50(1H, m), 1.44(1H, m)            | 18.25      |
| C7(CH <sub>2</sub> )  | 1.53(1H, m), 1.27(1H, m)            | 35.27      | 1.51(1H, m), 1.26(1H, m)            | 35.25      |
| C8(qC)                |                                     | 40.37      |                                     | 40.34      |
| C9(CH)                | 1.32 (1H, m)                        | 50.81      | 1.31(1H, m)                         | 50.76      |
| C10(qC)               |                                     | 37.14      |                                     | 37.12      |
| C11(CH <sub>2</sub> ) | 1.87(1H, m), 1.50(1H, m)            | 21.8       | 1.49(1H, m), 1.46(1H, m)            | 21.53      |
| C12(CH <sub>2</sub> ) | 1.75(1H, m), 1.33(1H, m)            | 25.85      | 1.77(1H, m), 1.47(1H, m)            | 25.7       |
| C13(CH)               | 1.64 (1H, m)                        | 42.83      | 1.56 (1H, m)                        | 42.93      |
| C14(qC)               |                                     | 50.02      |                                     | 50.03      |
| C15(CH <sub>2</sub> ) | 1.46 (1H, m), 1.06 (1H, m)          | 26.99      | 1.62(1H, m), 1.44(1H, m)            | 26.1       |
| C16(CH <sub>2</sub> ) | 1.76 (1H, m), 1.63 (1H, m)          | 31.44      | 1.84 (1H, m), 1.06 (1H, m)          | 31.44      |
| C17(CH)               | 1.86 (1H, m)                        | 49.82      | 1.79 (1H, m)                        | 49.5       |
| C18(CH <sub>3</sub> ) | 0.97(3H, s)                         | 15.47      | 0.94(3H, s)                         | 15.41      |
| C19(CH <sub>3</sub> ) | 0.85(3H, s)                         | 16.24      | 0.83(3H, s)                         | 16.21      |
| C20(qC)               |                                     | 86.55      |                                     | 86.41      |
| C21(CH <sub>3</sub> ) | 1.11(3H, s)                         | 27.18      | 1.12(3H, s)                         | 23.51      |
| C22(CH <sub>2</sub> ) | 1.87(1H, m), 1.67(1H, m)            | 34.72      | 1.62(1H, m), 1.55(1H, m)            | 35.66      |
| C23(CH <sub>2</sub> ) | 1.80(1H, m), 1.75(1H, m)            | 26.35      | 1.85(1H, m), 1.77(1H, m)            | 27.35      |
| C24(CH)               | 3.64 (dd, <i>J</i> = 10.2, 5.2)     | 86.29      | 3.72 (t, <i>J</i> = 7.4)            | 83.29      |
| C25(qC)               |                                     | 70.24      |                                     | 71.43      |
| C26(CH <sub>3</sub> ) | 1.19(3H, s)                         | 27.83      | 1.20(3H, s)                         | 27.46      |

---

|                       |              |       |              |       |
|-----------------------|--------------|-------|--------------|-------|
| C27(CH <sub>3</sub> ) | 1.11(3H, s)  | 24.04 | 1.11(3H, s)  | 24.23 |
| C28(CH <sub>3</sub> ) | 0.97 (3H, s) | 27.99 | 0.96 (3H, s) | 27.97 |
| C29(CH <sub>3</sub> ) | 0.77(3H, s)  | 15.35 | 0.76(3H, s)  | 15.33 |
| C30(CH <sub>3</sub> ) | 0.87(3H, s)  | 16.4  | 0.86(3H, s)  | 16.44 |

---

**Table S22.** Relative composition of identified products for the nine OSCs. The relative abundance of each compound is calculated based on the area of the corresponding peak.

| <b>Protein ID</b> | <b><math>\delta</math>-Amyrin</b> | <b><math>\beta</math>-Amyrin</b> | <b><math>\alpha</math>-Amyrin</b> | <b><math>\psi</math>-Taraxasterol</b> | <b>Taraxasterol</b> | <b>Dammarenediol-II</b> | <b>3-Epicabralediol</b> | <b>Ocotillo</b> | <b>Total</b> |
|-------------------|-----------------------------------|----------------------------------|-----------------------------------|---------------------------------------|---------------------|-------------------------|-------------------------|-----------------|--------------|
| <b>PvOSC6</b>     | 1.35%                             | 27.41%                           | 52.91%                            | 3.35%                                 | 0.81%               | 0.19%                   | 12.99%                  | 0.99%           | 100.00%      |
| <b>PgOSC9</b>     | 0.93%                             | 24.29%                           | 63.06%                            | 3.57%                                 | 0.46%               | 0.52%                   | 5.86%                   | 1.31%           | 100.00%      |
| <b>PnOSC5</b>     | 1.01%                             | 23.71%                           | 62.46%                            | 3.12%                                 | 0.71%               | 0.16%                   | 7.90%                   | 0.93%           | 100.00%      |
| <b>CaOSC6</b>     | 3.34%                             | 23.78%                           | 8.51%                             | 43.33%                                | 7.63%               | 0.88%                   | 11.37%                  | 1.16%           | 100.00%      |
| <b>CaOSC5</b>     | 1.20%                             | 29.97%                           | 60.47%                            | 3.48%                                 | 0.51%               | 0.10%                   | 3.82%                   | 0.45%           | 100.00%      |
| <b>PgOSC11</b>    | 0%                                | 0%                               | 0%                                | 0%                                    | 0%                  | 22.82%                  | 4.77%                   | 72.41%          | 100.00%      |
| <b>PqDDS</b>      | 0%                                | 0%                               | 0%                                | 0%                                    | 0%                  | 80.25%                  | 2.04%                   | 17.71%          | 100.00%      |
| <b>PvOSC7</b>     | 0%                                | 0%                               | 0%                                | 0%                                    | 0%                  | 80.05%                  | 2.05%                   | 17.90%          | 100.00%      |
| <b>PnOSC6</b>     | 0%                                | 0%                               | 0%                                | 0%                                    | 0%                  | 84.11%                  | 1.85%                   | 14.04%          | 100.00%      |

**Table S23.** Summary of *P. vietnamensis* var. *fuscidiscus* sequencing data.

| Type                                   | Library        | Insert size<br>(bp) | Reads<br>number | GC content<br>(%) | Mean reads length<br>(bp) | Reads length N50<br>(bp) | Base<br>(Gb) | Coverage<br>depth |
|----------------------------------------|----------------|---------------------|-----------------|-------------------|---------------------------|--------------------------|--------------|-------------------|
| <b>Illumina genomic<br/>sequencing</b> | YSQ-1          | 150                 | 207,536,126     | 39.98             | -                         | -                        | 31.13        | 132.64 X          |
|                                        | YSQ-3          | 150                 | 421,194,574     | 40.01             | -                         | -                        | 63.18        |                   |
|                                        | YSQ-5          | 150                 | 370,979,332     | 40.03             | -                         | -                        | 55.65        |                   |
|                                        | YSQ-7          | 150                 | 530,083,054     | 39.14             | -                         | -                        | 79.51        |                   |
| <b>Pacbio genomic sequencing</b>       | YSQ-<br>pacbio | -                   | 11,577,317      | -                 | 10,117                    | 17,312                   | 117.13       | 67.71 X           |
| <b>Hic sequencing</b>                  | YSQ-Hic        | 150                 | 1,688,961,966   | 37                | -                         | -                        | 253.34       | 146.44 X          |
| <b>RNA sequencing</b>                  | Leaf-1         | 150                 | 49,842,528      | -                 | 150                       | 150                      | 7.46         | 12.32 X           |
|                                        | Stem-1         | 150                 | 43,288,694      | -                 | 150                       | 150                      | 6.49         |                   |
|                                        | Root-1         | 150                 | 49,166,928      | -                 | 150                       | 150                      | 7.36         |                   |
| <b>Total</b>                           | -              | -                   | -               | -                 | -                         | -                        | 621.25       | 370.94 X          |

**Table S24.** Source information of species used in phylogenetic analysis.

| <b>Species</b>                                    | <b>Family</b>     | <b>Source</b>                      |
|---------------------------------------------------|-------------------|------------------------------------|
| <i>Vitis vinifera</i>                             | Vitaceae          | 10.1038/nature06148                |
| <i>Coffea canephora</i>                           | Rubiaceae         | 10.1126/science.1255274            |
| <i>Codonopsis pilosula</i>                        | Campanulaceae     | medicinalplants.ynau.edu.cn/genome |
| <i>Welwitschia mirabilis</i>                      | Welwitschiaceae   | 10.1038/s41467-021-24528-4         |
| <i>Lactuca sativa</i>                             | Asteraceae        | 10.1038/ncomms14953                |
| <i>Lonicera japonica</i>                          | Lonicera japonica | 10.1111/nph.16552                  |
| <i>Centella asiatica</i>                          | Apiaceae          | 10.1016/j.ygeno.2021.05.019        |
| <i>Daucus carota</i>                              | Apiaceae          | 10.1038/ng.3574                    |
| <i>Apium graveolens</i>                           | Apiaceae          | 10.1111/pbi.13499                  |
| <i>Eleutherococcus senticosus</i>                 | Araliaceae        | 10.1111/1755-0998.13403            |
| <i>Panax ginseng</i>                              | Araliaceae        | 10.1111/pbi.12926                  |
| <i>Panax notoginseng</i>                          | Araliaceae        | This study                         |
| <i>Panax vietnamensis</i> var. <i>fuscidiscus</i> | Araliaceae        | This study                         |
